# 1 The Arabidopsis AAC Proteins CIL and CIA2 Are Sub- 2 functionalized Paralogs involved in Chloroplast 3 Development

4 Mingjiu Li<sup>a</sup>, Hannes Ruwe<sup>b</sup>, Michael Melzer<sup>c</sup>, Astrid Junker<sup>d</sup>, Götz Hensel<sup>e</sup>, Henning  
5 Tschiersch<sup>d</sup>, Serena Schwenkert<sup>f</sup>, Sindy Chamas<sup>e,1</sup>, Christian Schmitz-Linneweber<sup>b</sup>,  
6 Thomas Börner<sup>b,2</sup>, and Nils Stein<sup>a,g,2</sup>

7 <sup>a</sup>Genomics of Genetic Resources Group, Department of Genebank, Leibniz Institute  
8 of Plant Genetics and Crop Plant Research (IPK), 06466 Seeland, Germany

9 <sup>b</sup>Molecular Genetics Group, Institute of Biology, Humboldt University, Rhoda Erdmann  
10 Haus, Philippstrasse 13, 10115 Berlin, Germany

11 <sup>c</sup>Structural Cell Biology Group, Department of Physiology and Cell Biology, IPK, 06466  
12 Seeland, Germany

13 <sup>d</sup>Acclimation Dynamics and Phenotyping Group, Department of Molecular Genetics,  
14 IPK, 06466 Seeland, Germany

15 <sup>e</sup>Plant Reproductive Biology Group, Department of Physiology and Cell Biology, IPK,  
16 06466 Seeland, Germany

17 <sup>f</sup>Department of Biology I, Ludwig-Maximilians University of Munich, 82152 Planegg-  
18 Martinsried, Germany

19 <sup>g</sup>Center for Integrated Breeding Research (CiBreed), Department of Crop Sciences,  
20 Georg-August-University Göttingen, 37073 Göttingen, Germany

21 <sup>1</sup>Current address: Erfurt Research Centre for Horticultural Crops, Erfurt University of  
22 Applied Sciences, 99090 Erfurt, Germany

23 <sup>2</sup>Corresponding authors: Thomas Börner: [thomas.boerner@rz.hu-berlin.de](mailto:thomas.boerner@rz.hu-berlin.de); Nils Stein;  
24 [stein@ipk-gatersleben.de](mailto:stein@ipk-gatersleben.de)

25 **Running title:** CIL and CIA2 contribute to chloroplast development

## 26 HIGHLIGHT

27 The nucleus-localized CCT domain proteins CIA2 and CIL in Arabidopsis and the  
28 homologous chloroplast-localized HvCMF3 and HvCMF7 in barley retained partially  
29 overlapping functions in chloroplast development.

30 **ABSTRACT**

31 The Arabidopsis gene *Chloroplast Import Apparatus 2* (*CIA2*) encodes a transcription  
32 factor that positively affects the activity of nuclear genes for chloroplast ribosomal  
33 proteins and chloroplast protein import machineries. *CIA2-like* (*CIL*) is the paralogous  
34 gene of *CIA2*. We generated a *cil* mutant by site-directed mutagenesis and compared  
35 it with *cia2* and *cia2cil* double mutant. Phenotype of the *cil* mutant did not differ from  
36 the wild type under our growth conditions, except faster growth and earlier time to  
37 flowering. Compared to *cia2*, the *cia2cil* mutant showed more impaired chloroplast  
38 functions and reduced amounts of plastid ribosomal RNAs. *In silico* analyses predict  
39 for *CIA2* and *CIL* a C-terminal CCT domain and an N-terminal chloroplast transit  
40 peptide (cTP). Chloroplast (and potentially nuclear) localization was previously shown  
41 for HvCMF3 and HvCMF7, the homologs of *CIA2* and *CIL* in barley. We observed  
42 nuclear localization of *CIL* after transient expression in Arabidopsis protoplasts.  
43 Surprisingly, transformation of *cia2* with *HvCMF3*, *HvCMF7* or with a truncated *CIA2*  
44 lacking the predicted cTP could partially rescue the pale-green phenotype of *cia2*.  
45 These data are discussed with respect to potentially overlapping functions between  
46 *CIA2*, *CIL* and their barley homologs and to the function of the putative cTPs of *CIA2*  
47 and *CIL*.

48 **Keywords:** *Arabidopsis thaliana*, CCT domain, chloroplast development, chloroplast  
49 translation, *Hordeum vulgare*, paralogous genes, photosynthesis, ribosomal RNA  
50 processing, transcription factor

## 51 INTRODUCTION

52 The development from proplastids to photosynthetically active chloroplasts in  
53 differentiating meristematic cells during leaf formation requires the concerted action of  
54 genes encoded by the nuclear and the chloroplast genome (plastome). In higher  
55 plants, the plastome contains around 100 genes, while the chloroplast proteome  
56 comprises more than 3000 proteins (Sugiura, 1995; Sun et al., 2009b). Consequently,  
57 the vast majority of chloroplast proteins are encoded in the nuclear genome and are  
58 subsequently imported into the plastids; in most cases by help of an N-terminal  
59 chloroplast transit peptide, cTP (Leister, 2003; Lee and Hwang, 2018; Nakai, 2018).  
60 Virtually all proteins required for the regulation of chloroplast development and the  
61 response of chloroplasts to environmental cues are nuclear-encoded and perform their  
62 function(s) in the plastids/chloroplasts, nucleus, cytoplasm or even both plastids and  
63 nucleus. Outside of plastids localized proteins might act, e.g., as transcriptional  
64 regulators or support protein import from the cytoplasm into these organelles. Only a  
65 limited number of nuclear encoded proteins with regulatory and/or non-metabolic  
66 function in chloroplast development have hitherto been characterized.

67 Recently, we identified a small class of nuclear-encoded proteins in seed plants (Li et  
68 al., 2019b; Li et al., 2019a) representing a subfamily of CMF (CCT MOTIF FAMILIE)  
69 proteins (Cockram et al., 2012). The CCT domain [from the three Arabidopsis  
70 (*Arabidopsis thaliana*) proteins CONSTANS, CONSTANS-LIKE and TIMING OF  
71 CAB1] is found near the C-terminus of numerous proteins. As far as a function is  
72 known, CCT domain proteins are transcriptional (co-)regulators typically involved in  
73 modulating flowering time, light-induced signaling and circadian rhythm (Cockram et  
74 al., 2012). The CCT domain is described to support transport into the nucleus and  
75 protein-protein interactions (Kurup et al., 2000; Strayer et al., 2000; Robson et al.,  
76 2001). The members of the newly identified subfamily have only the single CCT domain  
77 in common with other CMF proteins, but share several conserved regions including a  
78 putative N-terminal cTP (Li et al., 2019a). Based on the three more intensively studied  
79 genes/proteins of this subfamily, we call this group of CCT domain containing proteins  
80 the AAC protein family [for: ALBOSTRIANS/HVAST/HVCMF7 (Li et al., 2019b),  
81 ALBOSTRIANS-LIKE/HVASL/HVCMF3 (Li et al., 2019a), and CHLOROPLAST  
82 IMPORT APPARATUS 2/CIA2 (Sun et al., 2001)] (Li et al., 2019a).

83  
84 Like other well characterized CCT domain proteins, the Arabidopsis protein CIA2 is  
85 reported to act as a nuclear transcription factor. CIA2 stimulates the transcription of  
86 genes coding for components of the chloroplast protein import apparatus and for  
87 chloroplast ribosomal proteins. Mutation of *CIA2* leads to a pale-green phenotype and  
88 reduced chloroplast protein import (Sun et al., 2001; Sun et al., 2009a). In contrast to  
89 CIA2, the other two studied AAC proteins, the barley (*Hordeum vulgare*) HvCMF3  
90 (ALBOSTRIANS-LIKE) and HvCMF7 (ALBOSTRIANS) are clearly localized in  
91 plastid/chloroplast and were also detected in the nucleus (Li et al., 2019b; Li et al.,  
92 2019a). Mutants of *HvCMF3* show a *xantha* phenotype and reduced amounts of  
93 chloroplast rRNAs, i.e., suffer from impaired chloroplast translation (Li et al., 2019a).  
94 Mutants of the ohnologous gene, *HvCMF7*, have albino and white-green striped  
95 leaves. They lack plastid ribosomes in white leaves and white leaf sectors, i.e., are  
96 unable to perform protein synthesis in plastids (Li et al., 2019b). Despite their different  
97 subcellular localization, the three proteins, CIA2, HvCMF3 and HvCMF7, play a critical

98 role in chloroplast development and are needed for the correct functioning of  
99 chloroplast ribosomes. Thus, together with the presence of a predicted cTP  
100 (Emanuelsson et al., 1999), this might imply for all or for most AAC gene family  
101 members a role in normal chloroplast function and/or development.

102 Here we report on the Arabidopsis gene *CHLOROPLAST IMPORT APPARATUS 2-*  
103 *LIKE*, *CIL*. *CIA2* and *CIL* are, like *HvCMF3* and *HvCMF7*, ohnologous genes, i.e.,  
104 originated as part of a whole genome duplication event early in the evolution of the  
105 *Brassicaceae* (Li et al., 2019a). We show that *CIL* is a nuclear localized protein. We  
106 induced a knock-out mutant of *CIL* by Cas9 endonuclease-site-directed mutagenesis  
107 and generated a double mutant, *cia2cil*. We compared *cil*, *cia2* and the double mutant  
108 *cia2cil* with respect to chlorophyll content, photosynthesis, chloroplast ultrastructure,  
109 and chloroplast rRNA accumulation and processing. The *cil* mutant did not express  
110 any visible phenotype different from wild type except a faster growth combined with  
111 earlier time of flowering. However, the double mutant *cia2cil* exhibited more severe  
112 defects in chloroplast development than the single mutant *cia2*. Genetic  
113 complementation of *cia2* indicated partially overlapping functions between the  
114 Arabidopsis and barley AAC genes *CIA2*, *HvCMF3* and *HvCMF7*.

115

## 116 RESULTS

### 117 Generation of *CIL* Knock-out Mutants by Site-directed Mutagenesis Using Cas9 118 Endonuclease

119 In Arabidopsis, the closest homologs of *HvCMF3* and *HvCMF7* are *CIA2* (AT5G57180)  
120 and *CIL* (AT4G25990). Sequence comparison of *CIA2* and *CIL* revealed that both  
121 homologs share 60.6% amino acid identity as determined by alignment with Clustal  
122 Omega (Madeira et al., 2019) (Figure 1). *HvCMF3/HvCMF7* in barley and *CIA2* in  
123 Arabidopsis have proven to be required for chloroplast development as supported by  
124 the chlorophyll-deficient phenotype of their respective mutants (Sun et al., 2001; Sun  
125 et al., 2009a; Li et al., 2019b; Li et al., 2019a). *In silico* analyses show that, in addition  
126 to the CCT domain, all four homologs contain putative N-terminal chloroplast transit  
127 peptides, and also one or more nuclear localization signal(s) [prediction by ChloroP  
128 (Emanuelsson et al., 1999) and cNLS Mapper (Kosugi et al., 2009); Figure 1 and data  
129 not shown]. In order to check whether *CIL* also plays a role in chloroplast development,  
130 we utilized site-directed mutagenesis by RNA-guided Cas9 endonuclease to induce  
131 lesion(s) in the *CIL* gene. Four guide RNAs (gRNAs) were designed targeting three  
132 genomic regions of the first exon of *CIL* (Figure 2A). Two out of 10 T<sub>1</sub> plantlets,  
133 AtCIL\_P4\_2 and AtCIL\_P9\_4, carried mutations at either or both PS2 and PS3 target  
134 sites and had chimeric genotypes (Figure 2B & Supplemental Figure 1). During  
135 propagation of the T<sub>2</sub> progeny, a homozygous mutant, AtCIL\_P4\_2\_18, carrying a 1  
136 bp insertion leading to a frame shift, was selected (Figure 2C). Homozygosity of the  
137 *CIL* locus of AtCIL\_P4\_2\_18 was confirmed by testing the T<sub>3</sub> progeny (Figure 2D). In  
138 addition, one homogeneously biallelic mutant, AtCIL\_P4\_2\_2\_5, was identified (Figure  
139 2D). The truncated gene in AtCIL\_P4\_2\_18 putatively carries the information for only  
140 the N-terminal 86 in-frame amino acids of *CIL*, strongly suggesting that it represents a  
141 null allele, i.e., has no functional product (Figure 2E). In the following, the plants

142 carrying the 1 bp insertion (AtCIL\_P4\_2\_18 and corresponding T<sub>3</sub> progenies) are  
143 referred to as *cil* mutant.

#### 144 **CIL Is Located in the Nucleus**

145 *CIA2* encodes a transcription factor that activates the expression of nuclear genes,  
146 which, so far studied, code for components of the chloroplast protein translocon and  
147 for chloroplast ribosomal proteins (Sun et al., 2001; Sun et al., 2009a). Based on an  
148 increased transcription of *CIL* in *cia2*, it was proposed that CIL potentially functions as  
149 an isoform of CIA2 (Sun et al., 2001). In agreement with its proposed function as a  
150 transcriptional regulator, CIA2 is reported to be located in the nucleus (Sun et al.,  
151 2001). However, ChloroP (Emanuelsson et al., 1999) and PredSL (Petsalaki et al.,  
152 2006) predict N-terminal cTPs for CIA2 and CIL (Figure 1). As an initial step towards  
153 elucidating the molecular function of CIL, we investigated the subcellular localization  
154 of CIL by constructing a C-terminal GFP fusion to CIL, expressed under control of the  
155 Arabidopsis *Ubiquitin 10* promoter (Figure 3A). Transient expression of CIL:GFP was  
156 achieved by PEG-mediated transformation of Arabidopsis protoplasts. The green  
157 fluorescence of CIL:GFP specifically accumulated in the nucleus (Figure 3B) indicating  
158 the location of CIL in the nucleus as reported for CIA2 (Sun et al., 2001) and contrasting  
159 with the chloroplast or dual import into chloroplasts and nucleus of the barley homologs  
160 HvCMF3 and HvCMF7 (Li et al., 2019b; Li et al., 2019a).

161 In a further attempt to clarify whether CIL is a nuclear protein (Figure 3) or may  
162 additionally be imported into plastids, we investigated its potential import into isolated  
163 chloroplasts. Originally, the localization of CIA2 was investigated with CIA2 fused N-  
164 terminally to GUS (Sun et al., 2001), which would have masked an N-terminal cTP and  
165 made the detection of a chloroplast import of CIA2 unlikely. Therefore, we included  
166 CIA2 in the assay. CIA2 and CIL were translated and radiolabeled with [<sup>35</sup>S]-  
167 methionine in reticulocyte lysates and incubated with isolated pea (*Pisum sativum*)  
168 chloroplasts. As a positive control the stromal protein FERREDOXIN-NADP(+)  
169 REDUCTASE (FNR) was used (Guan et al., 2019). FNR was imported as expected,  
170 since we observed the mature, processed form of the protein after incubation with  
171 chloroplasts. The mature protein was resistant to thermolysin treatment showing that  
172 FNR was inside of intact and import competent chloroplasts (Supplemental Figure 2).  
173 In contrast, only faint bands were visible after the import reaction and removal of the  
174 translation product in case of CIA2 and CIL. Moreover, none of these bands was  
175 resistant to thermolysin treatment indicating that both proteins were not transported  
176 into chloroplasts (Supplemental Figure 2). Therefore, CIA2 and CIL represent  
177 members of the AAC subfamily that are located in the nucleus.

#### 178 **Chlorophyll Content and Photosynthetic Parameters of *cia2*, *cil* and Double** 179 **Mutant *cia2cil***

180 The *cia2* mutant exhibits a pale-green phenotype (Figure 4A) as previously described  
181 by Sun et al. (2001), while the *cil* mutant did not differ phenotypically from the wild type  
182 (Col-0) under the growth conditions used in this study (Figure 4A, D-F). We generated  
183 a *cia2cil* double mutant by crossing the original EMS-induced *cia2* mutant with the  
184 newly generated *cil* mutant (AtCIL\_P4\_2\_18\_1). All obtained 13 F<sub>1</sub> hybrids showed a  
185 normal green phenotype. The homozygous *cia2cil* double mutants of the F<sub>2</sub> generation,



186 however, exhibited a distinctly retarded growth compared to *cia2*, *cil* and the wild type  
187 (Supplemental Figure 3F) and a more severe chlorophyll-deficient phenotype than *cia2*  
188 (Figure 4A-F; Supplemental Figure 3G) confirmed by measurements of the chlorophyll  
189 *a* and *b* contents (Figure 4D-E). The double mutant started flowering three days later  
190 than wild type and *cia2*, while *cil*, interestingly, started flowering two days earlier than  
191 wild type and *cia2* (Supplemental Table 1). The earlier flowering of the *cil* mutant  
192 correlates with its faster growth as reflected by the projected leaf area (Supplemental  
193 Figure 3F). Similar to wild type Col-0, all single and double mutants developed 14  
194 rosette leaves until reaching the bolting stage. Therefore, the differences between  
195 these lines with respect to day to flowering are may be explained by physiological  
196 changes that leading to different growth rates. The double mutant shows a delayed  
197 greening, i.e., the chlorophyll deficiency of *cia2cil* is more pronounced in young leaves.  
198 The green leaf pigmentation is increasing with further development; however, the  
199 leaves remain paler than in wild type (Figure 4A; Supplemental Figures 3G & 4A). The  
200 *cia2* single and *cia2cil* double mutants exhibited a higher chlorophyll *a:b* ratio than wild  
201 type (Figure 4F). Since photosystem II (PSII) is enriched in chlorophyll *b* as compared  
202 to PSI, the higher chlorophyll *a:b* ratio could be an indication that PSII is more severely  
203 affected than PSI in *cia2* and *cia2cil* mutants.

204 We used non-invasive chlorophyll fluorescence imaging integrated into an automated,  
205 conveyor-based phenotyping platform to quantify photosynthesis-related traits of *cil*,  
206 *cia2* and *cia2cil* (Junker et al., 2015; Tschiersch et al., 2017). The PSII operating  
207 efficiency ( $\Phi$ PSII) of *cil* did not differ from Col-0. In contrast, the respective levels were  
208 mildly but significantly increased in *cia2* and *cia2cil* compared to Col-0 (Figure 4B &  
209 4G). The elevation of  $\Phi$ PSII in *cia2* and *cia2cil* was independent of light intensity and  
210 light-/dark-adaptation; as expected,  $\Phi$ PSII values decreased at high light intensity of  
211 400  $\mu$ E as compared to low light intensity of 120  $\mu$ E (Figure 4B & 4G; Supplemental  
212 Figure 3A-C). Intriguingly, as revealed by NDVI (normalized difference vegetation  
213 index) imaging, *cia2* and *cia2cil*, compared to the wild type and *cil*, showed a  
214 substantial decrease in the absorbance of actinic light (Figure 4C & 4H) resulting in a  
215 lower electron transport rate (Figure 4I and Supplemental Figure 3E). This suggests  
216 that the slightly increased PSII efficiency of *cia2* and *cia2cil* cannot compensate for the  
217 low amount of energy absorbed by PSII under steady-state light conditions. Next, we  
218 examined the role of photochemical quenching in *cil*, *cia2* and *cia2cil* by measuring the  
219 maximum quantum yield of PSII photochemistry in the dark-adapted state ( $F_v/F_m$ ), the  
220 'excess excitation energy' indicator non-photochemical quenching (NPQ) and PSII  
221 efficiency factor  $qP$  (representing the fraction of open PSII reaction centers). There  
222 was no difference between *cil* and Col-0 for all measured parameters. In line with the  
223 observed higher PSII operating efficiency, the  $F_v/F_m$  values were significantly higher in  
224 *cia2* and *cia2cil*. Interestingly, *cia2* exhibited a higher  $F_v/F_m$  than the *cia2cil* double  
225 mutant (Figure 4J). Also, the NPQ and  $qP$  values were significantly increased in both  
226 mutants (Figure 4K; Supplemental Figure 3D). The increase of  $F_v/F_m$  in the dark-  
227 adapted state could indicate that *cia2* and *cia2cil* have intrinsically more efficient PSII  
228 reaction centers, whereas the increase in photochemical quenching agrees with a  
229 larger fraction of PSII reaction centers performing photochemistry in *cia2* and *cia2cil*.

230 Overall, these results demonstrate that the mutations in *cia2* and *cia2cil* do not affect  
231 the primary function of PSII as indicated by the high values of maximum quantum yield

232 of PSII ( $F_v/F_m$ ). The decreased photosynthetic activity of the *cia2* and *cia2cil* mutants  
233 is due to the substantially decreased absorbance of actinic light, resulting in a lower  
234 electron transport rate. Moreover, mutation of the *CIL* gene alone has no significant  
235 effect on photosynthetic performance.

## 236 **CIA2 and CIL Affect Thylakoid Organization**

237 The observed chlorophyll deficiencies and differences in photosynthetic parameters  
238 between *cia2*, *cia2cil* double mutant and wild type suggest structural defects of  
239 chloroplasts caused by mutation. Therefore, we examined and compared chloroplast  
240 ultrastructure in wild type and mutants by transmission electron microscopy. Mutation  
241 of *CIA2* and/or *CIL* alters chloroplast morphology and the internal organization of the  
242 photosynthetic apparatus. Compared to Col-0, chloroplast size (width and length) was  
243 reduced in *cia2* and *cia2cil* mutants while *cil* mutants had smaller chloroplasts with  
244 reduced width only (Figure 5A-K). Further, the structure of grana was quantified within  
245  $1 \mu\text{m}^2$  areas. We observed a significant increase in the number of grana in *cil*, *cia2* and  
246 *cia2cil* compared to wild type (Figure 5L). A higher number of thylakoid membranes  
247 within each granum was observed in *cil*, but this number was lower in *cia2cil* and  
248 remained at the same level in *cia2* as compared to Col-0 (Figure 5M). The distance  
249 between each thylakoid was not different between wild type and mutants (Figure 5N).  
250 Finally, we measured the maximal height of grana in 40-80 chloroplasts of wild type  
251 and mutants. Compared to Col-0, the *cil* mutant contained grana composed of a higher  
252 number of thylakoid membranes; on the contrary, the maximal height of the grana and  
253 the number of thylakoids in the largest grana were significantly reduced in both *cia2*  
254 and *cia2cil* (Figure 5O-P). The lower number of thylakoids per granum is most likely  
255 responsible for the observed lower light absorbance and lower electron transport rate  
256 of the *cia2* and *cia2cil* mutants.

## 257 **Impaired Chloroplast rRNA Processing in *cia2* and *cia2cil***

258 Microarray expression analysis revealed a down-regulation of genes for chloroplast  
259 ribosomal proteins in *cia2* suggesting a role of CIA2 in maintaining chloroplast  
260 translation efficiency (Sun et al., 2009a). Since rRNAs do not accumulate if not  
261 incorporated into ribosomal subunits, the abundance of individual rRNA species serves  
262 as a proxy for the accumulation of the respective ribosomal subunits (Fristedt et al.,  
263 2014). Separation of cytosolic and chloroplast rRNA species on agarose gels revealed  
264 no striking difference between Col-0 and the *cil*, *cia2* as well as *cia2cil* mutants in  
265 mature leaves (Figure 6B; Supplemental Figure 4). While cytosolic and chloroplast  
266 rRNAs did apparently not differ in their abundance in young leaves among Col-0, *cil*  
267 and *cia2*, the amounts of the chloroplast rRNAs were distinctly reduced in young leaves  
268 of *cia2cil*, the 16S rRNA to lesser extent than the 23S rRNA (Figure 6B). Notably, the  
269 2.9 kb and 2.4 kb 23S rRNA precursors were faintly visible in *cia2* and *cia2cil*,  
270 suggesting defects in rRNA processing in both mutants (Figure 6A-B). RNA gel-blot  
271 analysis with specific probes against the 16S and 23S rRNAs revealed an inefficient  
272 processing of the 2.9 kb and 2.4 kb 23S rRNA precursors in both mature and young  
273 leaves of *cia2* and *cia2cil*, with the young leaves being more severely affected (Figure  
274 6C). We observed also an over-accumulation of the unprocessed 1.7 kb 16S rRNA  
275 precursor in young leaves of the *cia2cil* mutant, suggesting inefficient 3' trimming of  
276 the 1.9 kb 16S precursor (Figure 6A & 6D; Supplemental Figure 5). Thus, we obtained

277 evidence for impaired chloroplast rRNA processing in *cia2* and, to much more extent,  
278 in *cia2cil*, whereas *cil* did not differ from wild type.

## 279 **Barley Homologs and N-Terminally Truncated CIA2 Improve Chlorophyll Content** 280 **in *cia2***

281 *Hvcmf3*, *Hvcmf7*, *cia2* and *cil* (in the double mutant *cia2cil*) caused chloroplast  
282 ribosome deficiencies despite different subcellular localization of their gene products.  
283 A plausible assumption is that the barley and Arabidopsis genes might have  
284 overlapping functions. As *cil* lacks a visible phenotype and in order to rule out the  
285 additive effect of *cil* in the *cia2cil* mutant, we attempted heterologous complementation  
286 of *cia2* by *HvCMF3* and *HvCMF7*, respectively. Both barley genes were able to improve  
287 the *cia2* pale-green phenotype; the chlorophyll contents of the complementation lines  
288 were mildly but significantly increased compared to *cia2* (Figure 7A-B & 7D).

289 ChloroP (Emanuelsson et al., 1999) predicts for the N-terminal 59 amino acids of CIA2  
290 to function as chloroplast transit peptide (cTP). CIA2 was localized to the nucleus and  
291 not to the plastids in a previous study (Sun et al., 2001). However, GUS was fused N-  
292 terminally to CIA2 in this study thus hiding the putative cTP, i.e., this experiment did  
293 not exclude a potential chloroplast localization of CIA2. Yet, CIA2 was targeted only to  
294 the nucleus also in the present investigation. To test whether the predicted cTP is  
295 essential for CIA2 protein activity, we attempted to complement the *cia2* mutant with a  
296 truncated form of CIA2 ( $\Delta$  cTP\_CIA2; CIA2 without the predicted N-terminal cTP). Very  
297 similar to the phenotype of the *HvCMF3/HvCMF7* heterologous complementation lines,  
298 CIA2 without cTP was able to rescue partially the pale-green phenotype (Figure 7A-B  
299 & 7D). The chlorophyll content of transgenic plants bearing the empty vector control  
300 without insertion of ( $\Delta$  cTP\_CIA2, *CIL*, *HvCMF3* or *HvCMF7*) remained at the level  
301 observed with the *cia2* mutant. Therefore, the enhanced chlorophyll content of the  
302 complementation lines most likely results from the expression of the transgene.

303 To further characterize the transgenic lines, the PSII operating efficiency ( $\Phi$ PSII) of  
304 light-adapted plants was measured at 16, 18, 23 and 25 DAT (DAT, days after transfer  
305 to soil). Compared to *cia2*, the transgenic lines showed significantly lower  $\Phi$ PSII  
306 values, i.e., got closer to the level of Col-0 (Figure 7C & 7E). As in case of chlorophyll  
307 content, the *HvCMF3* transgenic line showed the largest effect compared to plants  
308 derived from the other two transgenic lines, observed at time points 23 and 25 DAT  
309 (Figure 7E). Quenching analysis of dark-adapted plants indicated a slight increase of  
310 the  $F_v/F_m$  value of the *HvCMF7* complementation line at 23 and 25 DAT, but not of the  
311 *HvCMF3* complementation lines.  $\Delta$  cTP\_CIA2 complementation lines exhibited a slight  
312 increase at 23 DAT, but dropped back to the *cia2* level at 25 DAT (Supplemental Figure  
313 6A). Non-photochemical quenching (NPQ) and photochemical quenching (qP) were  
314 increased in *cia2* compared to wild type (Figure 4K and Supplemental Figure 3D).  
315 Complementation of *cia2* with *HvCMF3* or *HvCMF7* but not with  $\Delta$  cTP\_CIA2 (except  
316 at time point 23 DAT for the qP value) reduced the mean values of NPQ and qP. Again,  
317 complementation by *HvCMF3* led to the largest degree of decrease (Supplemental  
318 Figure 6B-C). Taken together, the analyses of chlorophyll content and of  
319 photosynthetic parameters indicate a partial reduction of the effects of the CIA2  
320 mutation by complementation with *HvCMF3*, *HvCMF7* and  $\Delta$  cTP\_CIA2.



321

## 322 DISCUSSION

323 Transition of plastids into photosynthetic active chloroplasts requires the concerted  
324 action of the plastome and the nuclear genome. According to first studies on AtCIA2,  
325 HVCMF3 (ALBOSTRIANS-LIKE) and HvCMF7 (ALBOSTRIANS), the members of the  
326 small AAC subfamily of CCT motif proteins belong to nucleus encoded proteins that  
327 play essential roles in chloroplast development (Sun et al., 2001; Li et al., 2019b; Li et  
328 al., 2019a). Our present results indicate that the Arabidopsis AAC protein CIL has very  
329 similar functions to its ohnolog CIA2. Moreover, our data suggests partial functional  
330 coincidence of the barley proteins CMF3 and CMF7 with CIA2 although the barley and  
331 Arabidopsis proteins differ with respect to their subcellular localization.

332 As a first step towards elucidating the function of CIL, we generated a putative null  
333 mutant of the *CIL* gene. Because of the pale-green phenotype of *cia2* and the reported  
334 function of CIA2 as a transcriptional regulator of genes for chloroplast protein transport  
335 and chloroplast ribosomal proteins (Sun et al., 2001; Sun et al., 2009a), the majority of  
336 our investigation concerned parameters of *cil*, which are related to chloroplast function  
337 and development. To our surprise, we observed no significant differences between *cil*  
338 and wild type with respect to chlorophyll content, photosynthetic parameters, amount  
339 of chloroplast rRNA and chloroplast rRNA processing. These results and similar  
340 observations recently published by Gawronski et al. (2020) suggest that CIA2 and CIL  
341 have at least partially redundant functions and CIA2 activity alone is sufficient for  
342 growth and development under normal growth conditions. This conclusion is supported  
343 by the distinctly higher expression level (log<sub>2</sub> fold-change > 2) of *CIA2* compared to  
344 *CIL* in Col-0 according to the eFP expression atlas. Otherwise, both genes have a  
345 similar expression pattern. They are expressed in all organs and all developmental  
346 stages except mature siliques and roots of mature plants (Supplemental Figure 7;  
347 Arabidopsis eFP Browser, <http://bar.utoronto.ca/>) (Sun et al., 2001; Winter et al., 2007;  
348 Hruz et al., 2008).

349 The comparison of *cil* and *cia2* with their double mutant *cia2cil* further corroborates the  
350 hypothesis of redundant functions of CIL and CIA2. Although the visible phenotype and  
351 most other analyzed parameters of *cil* did not differ from Col-0, the double mutant  
352 showed more severe differences to the wild type than *cia2*. Obviously, mutation of *cil*  
353 potentiates the effects of the *cia2* mutation. This phenomenon is called 'phenotype  
354 gap' (Ewen-Campen et al., 2017). It refers to the fact that, due to functional  
355 redundancy, knock out of one gene in a pair of paralogs leads to a loss-of-function  
356 mutant without a detectable phenotype. In Arabidopsis, a compilation of 70 paralogous  
357 gene pairs with loss-of-function in one paralog resembles the case of *CIA2/CIL* (Lloyd  
358 and Meinke, 2012), i.e., the mutant of only one of the two paralogous genes showed a  
359 phenotype, which was more severely expressed in the double mutant. The fact, that  
360 *CIA2* and *CIL* have been kept as active genes in the genome since their occurrence  
361 as result of the whole genome duplication in the *Brassicaceae* (Muhlhausen and  
362 Kollmar, 2013), makes sub-functionalization (Lynch and Conery, 2000) of two  
363 homologous genes likely. The pattern of gene expression over most stages of  
364 development in green as well as non-green tissues suggests that CIL and CIA2 are  
365 not exclusively involved in chloroplast biogenesis. A first hint supporting this

366 assumption may be our observation of faster growth and earlier flowering of *cil*  
367 compared to Col-0 and the other analyzed mutants. Yang and Sun (2020) reported on  
368 interactions of CIA2 and CIL with flowering-control proteins. Our data points to a more  
369 general effect of CIL on development.

370 The impaired processing of plastid 16S and 23S rRNAs observed in *cia2cil* and to  
371 lesser extent in *cia2* may explain the reduced amount of plastid rRNAs in *cia2cil* and  
372 may negatively affect ribosome function, i.e., protein synthesis in chloroplasts.  
373 Chloroplast rRNA processing requires several specific enzymes and the assembly of  
374 the precursor rRNA with ribosomal proteins (e.g., Barkan, 1993; Yu et al., 2008; Jiang  
375 et al., 2018). Thus, the function proposed for CIA2 by Sun et al. (2009a) as transcription  
376 regulator of genes coding for chloroplast ribosomal proteins and for components of the  
377 translocon required for protein import into chloroplasts, is in agreement with the  
378 observed delayed chloroplast rRNA processing in *cia2* and *cia2cil* and reduced  
379 amounts of plastid rRNAs in *cia2cil*. The more serious effect of the two mutations in  
380 *cia2cil* compared to *cia2* on 16S and 23SrRNA processing, chlorophyll content,  
381 thylakoid/grana structure and, in particular, photosynthetic parameters may be  
382 responsible for the slower growth of *cia2cil* vs. *cia2*, *cil* and wild type. Mutant analyses  
383 demonstrated that inefficient chloroplast translation is often associated with altered  
384 organization of the thylakoid membrane system (Fristedt et al., 2014; Liu et al., 2015;  
385 Zhang et al., 2017; Li et al., 2019a). The delayed greening phenotype of *cia2cil*  
386 resembles the *rbf1-1* mutant with defects in chloroplast translation due to inefficient  
387 processing of 16S rRNA (Fristedt et al., 2014). Chloroplast development has an  
388 extraordinarily high demand for *de novo* protein biosynthesis. Therefore, even a mild  
389 disturbance of the translational machinery of the plastids may result in delayed  
390 greening of the young developing leaves. The demand for translation capacity  
391 decreases during the subsequent aging process and the translational machinery in  
392 mutants with a mild plastid ribosome deficiency gets time to catch up and restores to  
393 wild type levels of chloroplast proteins (Fristedt et al., 2014). Impaired import of  
394 proteins into chloroplasts as reported for CIA2 (Sun et al., 2001) could also directly  
395 affect the structure of thylakoids, the function of photosynthesis and the synthesis of  
396 chlorophylls since virtually all functions of chloroplasts need nuclear-gene-encoded  
397 proteins imported from the cytoplasm (Jarvis et al., 1998; Bauer et al., 2000).

398 A nuclear localization of CIL would be a precondition to function like its homolog CIA2  
399 as a transcription regulator of nuclear genes involved in chloroplast development. A  
400 suite of programs is available to predict *in silico* the subcellular localization of proteins.  
401 Interestingly, nuclear localization signals, NLS, but also chloroplast transit peptides,  
402 cTPs, are predicted for CIA2 and CIL as well as for their barley homologs HvCMF3  
403 and HvCMF7. In correspondence with the predictions, we detected HvCMF3 and  
404 HvCMF7 in chloroplasts and, according to preliminary data, in the nucleus (Li et al.,  
405 2019b; Li et al., 2019a). In our present study, we detected CIL, C-terminally fused with  
406 GFP, only in the nucleus. There was no indication for a transport into chloroplasts or  
407 other compartments of Arabidopsis protoplasts. Moreover, neither CIL nor CIA2 were  
408 imported into isolated chloroplasts. In contrast to the situation with FNR, neither the  
409 imported processed proteins nor the preproteins of CIA2 and CIL were observed after  
410 the import assays (Supplemental Figure 2, lanes 2 and 3). Thus, the *in silico* predicted  
411 cTPs (Figure 1) [e.g., by ChloroP (Emanuelsson et al., 1999) and PredSL (Petsalaki et

412 al., 2006)] do not seem to support the binding to the envelop of the chloroplasts and  
413 not the import of the two Arabidopsis proteins into these organelles (Supplemental  
414 Figure 2). Gawronski et al. (2020) recently reported also an import of CIL exclusively  
415 into the nucleus; however, they observed an import of CIA2 into both plastids and  
416 nucleus. They used experimental conditions that differed from those in our  
417 experiments, e.g., expression of CIA2 by a different promoter. More studies are needed  
418 to find out whether the import of CIA2 takes place only under certain conditions. We  
419 have, for example, not checked the possibility of a role in the transport of proteins into  
420 plastid types other than the investigated chloroplasts, e.g., into plastids at an earlier  
421 stage in their development to chloroplasts. The conservation of the N-terminal amino  
422 acid sequence extending over the predicted cTP (Figure 1) suggests, however, that  
423 this part of the AAC proteins is of functional importance. *In silico* analyses suggest a  
424 different (or additional to cTP) function of the N-terminal region. The tools WoLF  
425 PSORT (Horton et al., 2007) and Localizer (Sperschneider et al., 2017) predict a high  
426 probability for a nuclear localization of CIA2 and CIL since they possess potential NLS  
427 near their N-terminus and in other regions. NLS function is also predicted for the N-  
428 terminal regions of HvCMF3 and HvCMF7 and supported by the observation of nuclear  
429 localization of GFP, N-terminally fused with the predicted cTPs of the two barley  
430 proteins (Li et al., 2019b; Li et al., 2019a). Yang and Sun (2020) reported functional  
431 NLS in the N-terminal regions of CIA2 and CIL.

432 A function of the N-terminal domain additional to or other than as cTP is also suggested  
433 by results of our attempts to rescue the *cia2* mutant by transformation with a construct  
434 expressing a truncated form of CIA2 that lacks completely the predicted N-terminal  
435 cTP and NLS (Figure 1). The truncated CIA2 should not be imported into chloroplasts.  
436 However, it might still enter the nucleus by diffusion or with support of the predicted  
437 NLS other than the NLS near the N-terminus. The size of CIL makes the necessity of  
438 an active transport into the nucleus very likely, but at least minor amounts may still  
439 diffuse into the nucleus (Wang and Brattain, 2007) and explain the observed limited  
440 rescuing of the *cia2* mutation. Alternatively, the rather low rescue potency of the  
441 truncated protein could be an indication for the importance of the N-terminal region for  
442 normal function of CIA2 in the nucleus. We conclude that CIL is a nuclear protein with  
443 low probability for a transport into chloroplasts, CIA2, CMF7 and CMF3 are most likely  
444 dually transported into plastids and nuclei, and the N-terminal region of the two  
445 Arabidopsis proteins CIL and CIA2 and of the barley proteins CMF3 and CMF7 contain  
446 NLS that support their active transport into the nucleus.

447 *Hvcmf3* showing a mild chloroplast ribosome deficiency and *Hvcmf7* lacking plastid  
448 ribosomes in albino tissue share defects in chloroplast translation with the Arabidopsis  
449 mutants *cia2* and *cia2cil*. Moreover, the four genes have similar structures and,  
450 although there is evidence for a chloroplast localization of HvCMF3 and HvCMF7, the  
451 two barley proteins are likely transported into both chloroplasts and nucleus (Li et al.,  
452 2019b; Li et al., 2019a). Depending on the prediction program used, sequence  
453 analyses suggest for all four proteins potential nuclear and/or chloroplast localization.  
454 Therefore, we attempted to rescue the *cia2* mutant by transformation with *HvCMF3*  
455 and *HvCMF7*. The obtained transgenic lines showed a partial rescue of the chlorophyll  
456 deficiency and improved photosynthetic performance suggesting that the barley  
457 proteins or their downstream effects may act in the same compartment and have

458 partially similar function(s) as CIA2. Due to their conserved domain structure, e.g., the  
459 CCT domain, they might be able to substitute CIA2 in protein-protein interactions,  
460 though with lower efficiency.

461 In our present study we characterized for the first time a mutant of the *CIA2* ortholog  
462 *CIL*, demonstrating a (partial) functional redundancy between CIA2 and CIL and that  
463 CIA2 (and therefore also CIL) shares partially overlapping functions with the two  
464 homologous barley proteins HvCMF3 and/or HvCMF7, respectively. We show that  
465 AAC proteins, representing a sub-family of the CCT domain containing proteins, act as  
466 nuclear/chloroplast proteins with a role in chloroplast development. Mutation of all four  
467 genes reduces the amount of chloroplast ribosomes, i.e., impairs chloroplast  
468 translation (mutation of *CIL* showed effects on chloroplasts only in combination with  
469 mutated *CIA2*). Impaired plastid translation leads to retrograde signaling affecting the  
470 expression of many nuclear genes, mainly those involved in the control of  
471 photosynthesis and stress response (Chan et al., 2016; Kleine and Leister, 2016;  
472 Crawford et al., 2018; Dietz et al., 2019; Zhao et al., 2020; Wu and Bock, 2021).  
473 Retrograde signaling has been analyzed in *Hvcmf7* (*albostrians*) (Börner, 2017;  
474 Rotasperti et al., 2020). It needs still to be investigated if retrograde signaling may also  
475 have effects on the expression of nuclear genes in *Atcia2*, *Atcil* and *Hvcmf3* and affect  
476 the phenotype of the mutants. It may be interesting in this context that *cia2* and *cil*  
477 differ from the wild type in their response to certain stresses (Gawronski et al., 2020).  
478 The four AAC genes are composed of conserved domains (Figure 1) suggesting that  
479 not only AtCIL but also HvCMF3 and HvCMF7, which partially could rescue the *cia2*  
480 mutant, have function(s) similar to *CIA2*, i.e., may act as regulators of the transcription  
481 of nuclear genes involved in chloroplast biogenesis. The proposed location of HvCMF3  
482 and HvCMF7 in the nucleus fits to this hypothesis. Interestingly, the two barley genes  
483 and possibly CIA2 are imported (also) into the chloroplasts/plastids (Li et al., 2019b; Li  
484 et al., 2019a; Gawronski et al., 2020). This observation will stimulate further research  
485 on this group of proteins, which may perform regulatory functions via protein-protein  
486 interactions not only in the nucleus (Sun et al., 2009a; Yang and Sun, 2020) but also  
487 in the plastids. The situation is reminiscent of other proteins that are dually localized in  
488 plastids and nuclei, participate in gene expression in both locations and may be  
489 involved in the communication between the organellar and nuclear genomes  
490 (Krupinska et al., 2020).

491

## 492 **EXPERIMENTAL PROCEDURES**

### 493 **Plant Materials and Growth Conditions**

494 *Arabidopsis* ecotype Col-0 was used for site-directed mutagenesis of the *CIL* gene.  
495 The plants were grown under phytochamber (poly klima, Freising, Germany)  
496 conditions with 16 h light / 8 h dark, at 20°C day / 17°C night, 65% relative humidity  
497 and photosynthetic active radiation (PAR) of 180  $\mu\text{mol m}^{-2} \text{s}^{-1}$  light intensity. Screening  
498 of Cas9-induced T1 plants and progeny propagation were performed under the same  
499 phytochamber condition as described above. All the plants were grown in substrate 2  
500 (Klasmann-Deilmann GmbH, Geeste, Germany).



501 Generation of the *cia2cil* double mutant: The *cia2* mutant (TAIR germplasm stock  
502 number CS6522;  
503 <https://www.arabidopsis.org/servlets/TairObject?type=stock&id=1000876084>) was  
504 used as maternal parent and pollinated with the *cil* mutant line AtCIL\_P4\_2\_18\_10 .  
505 F1 hybrids heterozygous for the *CIA2* locus were kept for seed production. Screening  
506 for homozygous *cia2cil* double mutants was performed in the F2 generation. All plants  
507 were grown in the phytochamber as described above.

508 Seeds of *cil* and *cia2cil* have been deposited at NASC (Nottingham Arabidopsis Stock  
509 Center). Links to the stock page: *cil* mutant (NASC ID: N2110093),  
510 [http://arabidopsis.info/StockInfo?NASC\\_id=2110093](http://arabidopsis.info/StockInfo?NASC_id=2110093); *cia2cil* mutant (NASC ID:  
511 N2110094), [http://arabidopsis.info/StockInfo?NASC\\_id=2110094](http://arabidopsis.info/StockInfo?NASC_id=2110094).

## 512 **Vector Construction**

513 The vectors generated in this study can be classified into three categories according  
514 to different experimental applications.

515 (1) Vectors for site-directed mutagenesis of the *CIL* gene. To generate an RNA-guided  
516 Cas9 expression vector we first integrated a *NcoI/Spel* fragment from pEN-Chimera  
517 (Fauser et al., 2014), containing the *U6-26* promoter from *Arabidopsis thaliana* and the  
518 gRNA-encoding chimera, into pAB-M (DNA-Cloning-Service, Hamburg, Germany),  
519 yielding in pSI55. In parallel, we generated a vector consisting of the *UBIQUITIN4-2*  
520 promoter from *Petroselinum crispum*, the *Cas9* sequence (codon optimized for  
521 *Arabidopsis thaliana*) and the *pea3A* gene from *Pisum sativum*. Therefore, the  
522 promoter and the first half of the *Cas9* sequence were amplified using pDe-Cas9  
523 (Fauser et al., 2014) as a template and the primer pair PromCas F/PromCas R, while  
524 the second part of the *Cas9* sequence together with the terminator was amplified by  
525 using the CasTerm F/CasTerm R primer combination (Supplemental Table 2). The  
526 pAB-M vector (DNA-Cloning-Service, Hamburg, Germany) was digested with *Spel* and  
527 Gibson Assembly (NEB, Frankfurt am Main, Germany) was performed according to  
528 the manufacturer's protocol using the beforehand amplified fragments to generate  
529 pSI56. In the last step, the gRNA-containing *NotI/Spel* fragment from pSI55 was  
530 integrated into pSI56 resulting in pSI57 – the gRNA/Cas9 vector in which the gRNA-  
531 specific part (annealed oligos) can be integrated via *BbsI* restriction enzyme sites. As  
532 a result, four vectors were constructed for site-directed mutagenesis of the *CIL* gene.  
533 The derived vectors were designated as pGH502 (for PS3 target motif), pGH503 (for  
534 PS1-2 target motif), pGH505 (for PS2 target motif) and pGH508 (for PS1-1 target  
535 motif), respectively. Subsequently, the expression cassette of pGH502, pGH503,  
536 pGH505 and pGH508 was individually introduced into the binary vector p6i-d35S-TE9  
537 (DNA-Cloning-Service, Hamburg, Germany) via the *SfiI* restriction sites. The resulting  
538 plasmids are designated as pGH474 (for PS3 target motif), pGH475 (for PS1-2 target  
539 motif), pGH477 (for PS2 target motif) and pGH480 (for PS1-1 target motif) and were  
540 used for *Agrobacterium*-mediated transformation of ecotype Col-0.

541 (2) Vector for Arabidopsis protoplast transformation for the determination of subcellular  
542 localization. The coding sequence of *CIL* was fused with the N terminus of the  
543 sequence encoding the GFP reporter (Chiu et al., 1996) through ligation into the

544 *SpeI/XmaI* cloning sites of the vector pSB179 (Li et al., 2019b). The derived vector was  
545 designated as pML53 (CIL:GFP) and used for Arabidopsis protoplast transformation.

546 (3) Vectors for genetic complementation of the *cia2* mutant. The coding sequence of  
547 *HvCMF7* and *HvCMF3* was inserted into the *SpeI/HindIII* cloning sites of pUbiAT-OCS  
548 (DNA-Cloning-Service, Hamburg, Germany) to produce pML29 and pML31,  
549 respectively. *SpeI/XmaI* cloning sites of pUbiAT-OCS were adopted for cloning of the  
550 truncated *CIA2* gene lacking the coding sequence for the predicted N-terminal  
551 chloroplast transit peptide (S<sup>2</sup>-R<sup>59</sup>); the derived vector is designated as pML36.  
552 Subsequently, the expression cassettes of pML29, pML31 and pML36 were  
553 individually introduced via the *SfiI* restriction sites into the binary vector p6i-d35S-TE9  
554 (DNA-Cloning-Service, Hamburg, Germany). The resulting plasmids are designated  
555 as pML30 (p6id35S:pUbiAT:HvCMF7), pML32 (p6id35S:pUbiAT:HvCMF3) and pML37  
556 (p6id35S:pUbiAT:▲cTP-CIA2) and were used for *Agrobacterium*-mediated  
557 transformation of the *cia2* mutant.

### 558 Arabidopsis Protoplast Transformation

559 Isolation and transformation of Arabidopsis protoplasts were performed following the  
560 protocol as described previously (Yoo et al., 2007). Briefly, protoplasts were isolated  
561 from 4-week-old Arabidopsis plants grown under the phytochamber conditions  
562 mentioned above. The protoplasts were suspended at a concentration of  $2 \times 10^5$  mL<sup>-1</sup>  
563 in W5 solution (154 mM NaCl, 125 mM CaCl<sub>2</sub>, 5 mM KCl, 4 mM MES, 5 mM glucose)  
564 after counting cells under the microscope using a hemocytometer. The W5 solution  
565 was replaced by an equal volume of MMG solution (0.8 M mannitol, 1 M MgCl<sub>2</sub>, 100  
566 mM MES) after incubation for 30 min on ice. Next, 100 μL of the prepared protoplasts  
567 were mixed gently with 20 μL of plasmid DNA (5 μg/μL) followed by adding and mixing  
568 completely with 110 μL of polyethylene glycol (PEG) solution (40% PEG 4000, 0.2 M  
569 mannitol, 0.1 M CaCl<sub>2</sub>). The transfection mixture was diluted with 400 μL of W5 solution  
570 by gently inverting the tube after keeping at room temperature for 10 min. The  
571 transfected protoplasts were collected by centrifugation at 100 g for 2 min.,  
572 resuspended in 1 mL of WI solution (0.5 M mannitol, 20 mM KCl, 4 mM MES) and  
573 incubated in darkness at room temperature for 24 hours. Then, GFP fluorescence was  
574 checked under the laser scanning confocal microscope system LSM780 (Carl Zeiss,  
575 Jena, Germany).

### 576 *In vitro* Chloroplast Import

577 The coding sequences of *CIL* and *CIA2* were cloned into pSP65 using *BamHI* and *SalI*  
578 as restriction sites. *In vitro* transcription and translation to radiolabel the proteins with  
579 [<sup>35</sup>S]-methionine was performed with the TnT<sup>®</sup> Quick Coupled  
580 Transcription/Translation System (Promega, Walldorf, Germany) in reticulocyte lysate.  
581 Pea plants (*Pisum sativum*, cv. 'Arvica') were grown on vermiculite for 10 days in a  
582 climate chamber [(14 h/10 h day-night cycle, 120 μE m<sup>-2</sup>s<sup>-1</sup>, temperatures of 20 °C/14  
583 °C (light/dark)]. The leaf material was mixed in isolation buffer (330 mM sorbitol, 20  
584 mM MOPS, 13 mM Tris pH 7.6, 3 mM MgCl<sub>2</sub>, 0.1 % BSA) filtered and centrifuged for  
585 1 min at 1900 g, 4°C. The pellet was loaded on a discontinuous gradient 40% Percoll  
586 solution (330 mM sorbitol, 50 mM HEPES pH 7.6, 40% Percoll) and 80% Percoll  
587 solution (330 mM sorbitol, 50 mM HEPES pH 7.6, 80% Percoll) for 5 min at 8000 g,

588 4°C. Intact chloroplasts were washed twice with washing buffer (330 mM sorbitol, 25  
589 mM HEPES pH 7.6, 3 mM MgCl<sub>2</sub>). The final pellet was resuspended in wash buffer  
590 and chlorophyll concentration was determined according to Arnon (1949). For the  
591 import reaction, 10 µg chlorophyll was used in a final reaction volume of 100 µl import  
592 buffer (300 mM sorbitol, 50 mM HEPES pH 8.0, 3 mM MgSO<sub>2</sub>, 50 mM ascorbic acid,  
593 20 mM gluconate, 10 mM NaHCO<sub>3</sub>, 0.2% BSA, 4 mM MgCl<sub>2</sub>, 10 mM methionine, 10  
594 mM cysteine, 3 mM ATP) together with 7 µl <sup>35</sup>S-labeled, translated preprotein. Import  
595 was performed for 20 min at 25°C. 100 µl wash buffer was added and samples were  
596 centrifuged at 1500xg for 1 min, 4°C. Pellets were resuspended in SDS loading buffer  
597 and proteins were separated by a 12% SDS-PAGE, which was vacuum dried and  
598 exposed on a Phosphorimager screen for 14 h. Screens were analyzed by a Typhoon  
599 Phosphorimager (GE Healthcare, Uppsala, Sweden).

### 600 **Stable Transformation of Arabidopsis**

601 Plasmids pML30, pML32 and pML37 were used for functional complementation of the  
602 *cia2* mutant. Vectors pGH474, pGH475, pGH477 and pGH480 were used for  
603 *Agrobacterium*-mediated transformation or co-transformation of Arabidopsis ecotype  
604 Col-0. The vectors were separately introduced into *A. tumefaciens* strain pGV2260  
605 using a heat shock protocol (Höfgen and Willmitzer, 1988). Briefly, thaw *Agrobacterium*  
606 competent cell on ice, add 1 µg plasmids and mix gently. The mixture was incubated  
607 successively for 5 min on ice, 5 min in liquid nitrogen and 5 min at 37°C. After dilution  
608 in 1 mL LB- medium [1% (w/v) tryptone, 0.5% (w/v) yeast extract, and 1% (w/v) NaCl]  
609 the cells were shaken at 250 rpm for 2 hours at 28°C. Aliquots of 200 µL were plated  
610 on LB-plates [LB-medium supplemented with 0.8% (w/v) agar] containing 100 µg/mL  
611 of spectinomycin and incubated for 2 days at 28°C. Transformation of Arabidopsis was  
612 achieved by using the floral dip method (Clough and Bent, 1998). One single colony  
613 was picked from the LB-plate and incubated in 5 mL LB-medium (starter medium) with  
614 shaking at 250 rpm for 24 hours. Subsequently, 1 mL starter medium was diluted in  
615 200 mL freshly prepared LB-medium and kept with shaking at 250 rpm for another 24  
616 hours. The cells were resuspended in 100 mL culture medium [5% (w/v) sucrose and  
617 0.05% (v/v) Silwet L-77] after collection by centrifugation (5500 g) for 10 min at room  
618 temperature. Now, the prepared infiltration medium is ready for transformation. For  
619 floral dip, infiltration medium was added to a beaker, Arabidopsis plants were inverted  
620 into the suspension such that all inflorescence tissues were submerged, and plants  
621 were then removed after 5 seconds of gentle agitation. The plants were kept in dark  
622 with 100% humidity for 24 hours and then maintained under greenhouse conditions as  
623 described above.

### 624 **Selection of Putative Transformants using an Antibiotic Marker**

625 Arabidopsis seeds were surface sterilized with 1 mL 70% (v/v) ethanol containing  
626 0.05% (v/v) Tween 20 (Merck, Darmstadt, Germany) by shaking on a table incubator  
627 at 1400 rpm for 3 min. After removing the supernatant, seeds were washed twice with  
628 1mL 100% ethanol, shaken by hand and the supernatant was immediately removed.  
629 Seeds were left under a fume hood to dry for 1 hour after removing the residual ethanol.  
630 Sterilized seeds were sown on ½ MS medium [0.22% (w/v) Murashige and Skoog  
631 Basal Medium (Sigma-Aldrich M5519, Taufkirchen, Germany); 0.8% (w/v) agar; pH =  
632 5.7] or ½ MS selection medium supplemented with 25 µg/ml hygromycin B (Thermo

633 Fisher Scientific, Braunschweig, Germany). Plant selection was performed following  
634 the rapid method as reported (Harrison et al., 2006). In brief, seeds were stratified for  
635 2 days in the dark at 4°C. After stratification, seeds were moved to the phytochamber  
636 (under above mentioned conditions), illuminated for 6 h in order to stimulate  
637 germination. The medium plates were then kept in dark for 2 days, wrapped with  
638 aluminium foil. The foil was removed and plates were incubated in the phytochamber  
639 for 3 days at long day conditions. Seedlings with long hypocotyl (i.e., positive  
640 transformants carrying T-DNA) were transferred into 6 cm (diameter) pots filled with  
641 substrate 2 (Klasmann-Deilmann, Geeste, Germany).

## 642 **Polymerase Chain Reaction**

643 For mutation detection of Cas9-induced mutants, polymerase chain reactions (PCR)  
644 were performed in a total volume of 20 µL containing 40 ng of genomic DNA, 4 mM  
645 dNTPs, 1 µL each of 5 µM forward and reverse primers, 2 µL of 10x PCR buffer  
646 (100mM Tris-HCl, pH8.3, 500 mM KCl, 15 mM MgCl<sub>2</sub>, and 0.01% gelatin), and 0.5  
647 units of HotStarTaq DNA polymerase (Qiagen, Hilden, Germany). The following touch-  
648 down PCR program was used with a GeneAmp 9700 thermal cycler (Life  
649 Technologies, Darmstadt, Germany): initial denaturation at 95°C for 5 min followed by  
650 five cycles at 94°C for 30 s, annealing at 65 to 60°C (-1°C/cycle) for 30 s, extension 1  
651 min at 72°C, and then proceed for 40 cycles at 94°C for 30 s, 60°C for 30 s, 72°C for  
652 1 min, and a final extension at 72°C for 10 min. For vector construction, the PCR  
653 reaction profile and program were setup as above with the following modifications: Q5  
654 high-fidelity DNA polymerase (NEB, Frankfurt am Main, Germany) and 5x Q5 reaction  
655 buffer were used for PCR amplification. cDNA of *CIA2/CIL* (Arabidopsis ecotype Col-  
656 0), *HvCMF3* and *HvCMF7* (barley cultivar 'Haisa'), respectively, was used as template.  
657 cDNA synthesis was performed as described previously (Li et al., 2019b). All PCR  
658 amplicons and derived vectors were sequenced on an ABI 3730 XL DNA analyzer (Life  
659 Technologies, Darmstadt, Germany).

## 660 **Chloroplast Ultrastructural Analysis**

661 The first leaves of the primary bolt were collected from plants used for the automated,  
662 imaging-based phenotyping experiment at developmental stage 26 DAS or DAT. For  
663 ultrastructural analysis, three biological replicates were prepared for each plant family  
664 and used for combined conventional and microwave-assisted chemical fixation,  
665 substitution and resin embedding following the protocol as described previously (Li et  
666 al., 2019a). Sectioning and transmission electron microscopy analysis was performed  
667 as described (Daghma et al., 2011).

## 668 **Determination of Chlorophyll Content**

669 Leaf material was harvested from 25-day-old seedlings, weighted and immediately  
670 frozen in liquid nitrogen. After homogenization (Mixer Mill MM400, Retsch GmbH,  
671 Haan, Germany), 1.5 mL of N,N-dimethylformamide (DMF) was added to each sample,  
672 followed by mixing on an overhead shaker (Keison Products, Chelmsford, England) for  
673 30 min. The supernatant obtained after centrifugation (14,000x *g* for 10 min, room  
674 temperature) was transferred to a new 2 mL Eppendorf tube. The chlorophyll content  
675 was determined according to Porra et al. (1989). In brief, cuvette-based measurement  
676 (cuvette with 1 mm path length) was conducted by help of a Spectramax Plus



677 spectrophotometer (GENEO BioTechProducts GmbH, Germany). Chlorophyll *a* and *b*  
678 content was calculated by the following equation: chlorophyll *a* =  $13.43(A^{663.8} - A^{750}) -$   
679  $3.47(A^{646.8} - A^{750})$ ; chlorophyll *b* =  $22.90(A^{646.8} - A^{750}) - 5.38(A^{663.8} - A^{750})$ .

## 680 High-throughput Automated, Imaging-based Phenotyping

681 Parameters related to photosynthetic performance were determined using an  
682 automated high throughput imaging system (Tschiersch et al., 2017). Two independent  
683 experiments were performed. Experiment I included four plant families: Col-0, *cil*  
684 mutant, *cia2* mutant and *cia2cil* mutant, with 15 plants per family. Instead of  
685 hygromycin selection, seeds of each family were directly sowed in the pots. Experiment  
686 II included five plant families: Col-0, *cia2* mutant and three families genetically  
687 complemented by *HvCMF3*, *HvCMF7* and  $\blacktriangle cTP\_CIA2$ , respectively. After antibiotic  
688 screening with hygromycin, 24 plants were selected from each of the Col-0, *cia2*  
689 mutant and *HvCMF3* families, and 96 plants were selected from each of the *HvCMF7*  
690 and  $\blacktriangle cTP\_CIA2$  families. The selected plants were transferred into the imaging  
691 system and phenotyping was performed following the protocols described previously  
692 (Li et al., 2019a) with the following modifications. For experiment I, measurement of  
693 PSII operating efficiency ( $\Phi_{PSII}$ ) and electron transport rate (ETR) were performed for  
694 light adapted plants. Equal light intensity of 120  $\mu\text{E}$  and 400  $\mu\text{E}$  was independently  
695 applied during the adaptation procedure. Determination of the quenching parameters  
696 ( $F_v/F_m$ , NPQ, qP) were measured for dark-adapted plants with a light intensity of 120  
697  $\mu\text{E}$ . Measurements were performed at two developmental stages, 20 and 25 DAS. For  
698 experiment II, a light intensity of 180  $\mu\text{E}$  was applied for determination of the chlorophyll  
699 fluorescence kinetics. Measurements were performed at 16, 18, 23 and 25 DAT.

## 700 RNA Gel-blot Analysis

701 RNA isolation was performed using the TRIzol reagent (Invitrogen) following  
702 manufacturer's instructions. One microgram of total RNA per lane was separated in  
703 1.2% agarose/formaldehyde gels. RNA was transferred to Hybond-N (GE Healthcare,  
704 Münster, Germany) by passive transfer overnight in 25mM sodium phosphate buffer,  
705 UV cross-linked and hybridized in an Ambion® ULTRAhyb® at 68°C overnight with  
706 fluorescently labelled RNA probes generated by *in vitro* transcription of templates  
707 obtained by PCR using oligonucleotides as described in Supplemental Table 2. The *in*  
708 *vitro* transcription reaction contained 0.25 mM 5-Azido-C3-UTP (Jena Bioscience,  
709 Jena, Germany). Purified RNA probes were Click-labelled with either Cy5.5-alkyne or  
710 Cy7.5-alkyne (Lumiprobe, Hannover, Germany). Hybridized membranes were washed  
711 twice in 0.5x SSC, 0.1% (w/v) SDS and twice in 0.1x SSC, 0.1% SDS at 68°C.  
712 Membranes were scanned using the Odyssey CLx Imaging system (LI-COR, Lincoln,  
713 USA).

714

## 715 SUPPLEMENTAL DATA

716 **Supplemental Figure 1.** Mutation detection in T1 plants by colony-PCR.

717 **Supplemental Figure 2.** Chloroplast import assay.

718 **Supplemental Figure 3.** Measurement of photosynthetic performance of wild type  
719 Col-0 and mutants *cil*, *cia2* and *cia2cil*.

720 **Supplemental Figure 4.** Analysis of chloroplast rRNA processing in Col-0, *cil*, *cia2*  
721 and *cia2cil* mutant plants.

722 **Supplemental Figure 5.** Quantification of ratio of mature 16S rRNA to pre-mature  
723 16S rRNA.

724 **Supplemental Figure 6.** Measurement of photosynthetic performance of *cia2*  
725 mutant, complementation lines and Col-0.

726 **Supplemental Figure 7.** Expression profile of *CIA2* and *CIL* on eFP viewer.

727 **Supplemental Table 1.** Flowering time of Col-0, *cil*, *cia2* and *cia2cil*.

728 **Supplemental Table 2.** Primers used in this study.

## 729 **ACKNOWLEDGEMENTS**

730 The authors gratefully acknowledge technical support from Mary Ziems for maintaining  
731 the Arabidopsis seeds; Susanne Koenig for Sanger sequencing; Gunda Wehrstedt and  
732 Ingo Muecke for their support in the LemnaTec experiment; Rhonda Meyer for support  
733 in cultivation of Arabidopsis; Marion Benecke and Kirsten Hoffie for microscopy; Hans-  
734 Peter Mock and Elena Brueckner for providing spectrophotometer facility and technical  
735 support on chlorophyll measurement; Cornelia Stock and Solmaz Khosravi for help in  
736 vector construction and Arabidopsis transformation; Tamara Bergius for technical  
737 assistance in the import experiments; Jochen Kumlehn for helpful discussion and  
738 supporting transformation experiments; S.S. thanks Jürgen Soll for helpful discussion.  
739 This work was supported by the Deutsche Forschungsgemeinschaft (DFG) grants STE  
740 1102/13-1 to N.S. and CRC TR-175, project B06 to S.S.

## 741 **AUTHOR CONTRIBUTIONS**

742 M.L., T.B. and N.S. conceived the study. M.L., H.R., M.M., A.J., H.T., G.H., S.S. and  
743 S.C. performed experiments; M.L. coordinated the project; all authors analyzed the  
744 data; M.L., T.B., and N.S. wrote the article.

## REFERENCES

- Arnon, D.I.** (1949). Copper Enzymes in Isolated Chloroplasts. Polyphenoloxidase in Beta Vulgaris. *Plant Physiol.* **24**, 1-15.
- Barkan, A.** (1993). Nuclear Mutants of Maize with Defects in Chloroplast Polysome Assembly Have Altered Chloroplast RNA Metabolism. *Plant Cell* **5**, 389-402.
- Bauer, J., Chen, K., Hiltbunner, A., Wehrli, E., Eugster, M., Schnell, D., and Kessler, F.** (2000). The major protein import receptor of plastids is essential for chloroplast biogenesis. *Nature* **403**, 203-207.
- Börner, T.** (2017). The discovery of plastid-to-nucleus retrograde signaling-a personal perspective. *Protoplasma* **254**, 1845-1855.
- Chan, K.X., Phua, S.Y., Crisp, P., McQuinn, R., and Pogson, B.J.** (2016). Learning the Languages of the Chloroplast: Retrograde Signaling and Beyond. *Annu. Rev. Plant Biol.* **67**, 25-53.
- Chiu, W., Niwa, Y., Zeng, W., Hirano, T., Kobayashi, H., and Sheen, J.** (1996). Engineered GFP as a vital reporter in plants. *Curr. Biol.* **6**, 325-330.
- Clough, S.J., and Bent, A.F.** (1998). Floral dip: a simplified method for Agrobacterium-mediated transformation of *Arabidopsis thaliana*. *Plant J.* **16**, 735-743.
- Cockram, J., Thiel, T., Steuernagel, B., Stein, N., Taudien, S., Bailey, P.C., and O'Sullivan, D.M.** (2012). Genome dynamics explain the evolution of flowering time CCT domain gene families in the Poaceae. *PLoS One* **7**, e45307.
- Crawford, T., Lehotai, N., and Strand, A.** (2018). The role of retrograde signals during plant stress responses. *J Exp Bot* **69**, 2783-2795.
- Daghma, D.S., Kumlehn, J., and Melzer, M.** (2011). The use of cyanobacteria as filler in nitrocellulose capillaries improves ultrastructural preservation of immature barley pollen upon high pressure freezing. *J. Microsc.* **244**, 79-84.
- Dietz, K.J., Wesemann, C., Wegener, M., and Seidel, T.** (2019). Toward an Integrated Understanding of Retrograde Control of Photosynthesis. *Antioxid Redox Signal* **30**, 1186-1205.
- Emanuelsson, O., Nielsen, H., and von Heijne, G.** (1999). ChloroP, a neural network-based method for predicting chloroplast transit peptides and their cleavage sites. *Protein Sci.* **8**, 978-984.
- Ewen-Campen, B., Mohr, S.E., Hu, Y., and Perrimon, N.** (2017). Accessing the Phenotype Gap: Enabling Systematic Investigation of Paralog Functional Complexity with CRISPR. *Dev. Cell* **43**, 6-9.
- Fausser, F., Schiml, S., and Puchta, H.** (2014). Both CRISPR/Cas-based nucleases and nickases can be used efficiently for genome engineering in *Arabidopsis thaliana*. *Plant J.* **79**, 348-359.
- Fristedt, R., Scharff, L.B., Clarke, C.A., Wang, Q., Lin, C., Merchant, S.S., and Bock, R.** (2014). RBF1, a plant homolog of the bacterial ribosome-binding factor RbfA, acts in processing of the chloroplast 16S ribosomal RNA. *Plant Physiol.* **164**, 201-215.
- Gawronski, P., Burdiak, P., Scharff, L.B., Mielecki, J., Gorecka, M., Zaborowska, M., Leister, D., Waszczak, C., and Karpinski, S.** (2020). CIA2 and CIA2-LIKE are required for optimal photosynthesis and stress responses in *Arabidopsis thaliana*. *Plant J.*
- Guan, L., Denkert, N., Eisa, A., Lehmann, M., Sjuts, I., Weiberg, A., Soll, J., Meinecke, M., and Schwenkert, S.** (2019). JASSY, a chloroplast outer membrane protein required for jasmonate biosynthesis. *Proc. Natl. Acad. Sci. U. S. A.* **116**, 10568-10575.

- Harrison, S.J., Mott, E.K., Parsley, K., Aspinall, S., Gray, J.C., and Cottage, A.** (2006). A rapid and robust method of identifying transformed *Arabidopsis thaliana* seedlings following floral dip transformation. *Plant Methods* **2**, 19.
- Höfgen, R., and Willmitzer, L.** (1988). Storage of competent cells for *Agrobacterium* transformation. *Nucleic Acids Res.* **16**, 9877.
- Horton, P., Park, K.J., Obayashi, T., Fujita, N., Harada, H., Adams-Collier, C.J., and Nakai, K.** (2007). WoLF PSORT: protein localization predictor. *Nucleic Acids Res.* **35**, W585-587.
- Hruz, T., Laule, O., Szabo, G., Wessendorp, F., Bleuler, S., Oertle, L., Widmayer, P., Gruissem, W., and Zimmermann, P.** (2008). Genevestigator v3: a reference expression database for the meta-analysis of transcriptomes. *Adv Bioinformatics* **2008**, 420747.
- Jarvis, P., Chen, L.J., Li, H., Peto, C.A., Fankhauser, C., and Chory, J.** (1998). An *Arabidopsis* mutant defective in the plastid general protein import apparatus. *Science* **282**, 100-103.
- Jiang, T., Zhang, J., Rong, L., Feng, Y., Wang, Q., Song, Q., Zhang, L., and Ouyang, M.** (2018). ECD1 functions as an RNA-editing trans-factor of rps14-149 in plastids and is required for early chloroplast development in seedlings. *J Exp Bot* **69**, 3037-3051.
- Junker, A., Muraya, M.M., Weigelt-Fischer, K., Arana-Ceballos, F., Klukas, C., Melchinger, A.E., Meyer, R.C., Riewe, D., and Altmann, T.** (2015). Optimizing experimental procedures for quantitative evaluation of crop plant performance in high throughput phenotyping systems. *Front Plant Sci* **5**, 770.
- Kleine, T., and Leister, D.** (2016). Retrograde signaling: Organelles go networking. *Biochim. Biophys. Acta* **1857**, 1313-1325.
- Kosugi, S., Hasebe, M., Tomita, M., and Yanagawa, H.** (2009). Systematic identification of cell cycle-dependent yeast nucleocytoplasmic shuttling proteins by prediction of composite motifs. *Proc. Natl. Acad. Sci. U. S. A.* **106**, 10171-10176.
- Krupinska, K., Blanco, N.E., Oetke, S., and Zottini, M.** (2020). Genome communication in plants mediated by organelle-nucleus-located proteins. *Philos. Trans. R. Soc. Lond. B Biol. Sci.* **375**, 20190397.
- Kurup, S., Jones, H.D., and Holdsworth, M.J.** (2000). Interactions of the developmental regulator ABI3 with proteins identified from developing *Arabidopsis* seeds. *Plant J.* **21**, 143-155.
- Lee, D.W., and Hwang, I.** (2018). Evolution and Design Principles of the Diverse Chloroplast Transit Peptides. *Mol. Cells* **41**, 161-167.
- Leister, D.** (2003). Chloroplast research in the genomic age. *Trends Genet.* **19**, 47-56.
- Li, M., Hensel, G., Melzer, M., Junker, A., Tschiersch, H., Arend, D., Kumlehn, J., Börner, T., and Stein, N.** (2019a). Mutation of the ALBOSTRIANS Ohnologous Gene HvCMF3 Impairs Chloroplast Development and Thylakoid Architecture in Barley due to Reduced Plastid Translation. *bioRxiv*.
- Li, M., Hensel, G., Mascher, M., Melzer, M., Budhagatapalli, N., Rutten, T., Himmelbach, A., Beier, S., Korzun, V., Kumlehn, J., Börner, T., and Stein, N.** (2019b). Leaf Variegation and Impaired Chloroplast Development Caused by a Truncated CCT Domain Gene in albstrians Barley. *Plant Cell* **31**, 1430-1445.
- Liu, J., Zhou, W., Liu, G., Yang, C., Sun, Y., Wu, W., Cao, S., Wang, C., Hai, G., Wang, Z., Bock, R., Huang, J., and Cheng, Y.** (2015). The conserved endoribonuclease YbeY is required for chloroplast ribosomal RNA processing in *Arabidopsis*. *Plant Physiol.* **168**, 205-221.



- Lloyd, J., and Meinke, D.** (2012). A Comprehensive Dataset of Genes with a Loss-of-Function Mutant Phenotype in Arabidopsis. *Plant Physiol.* **158**, 1115-1129.
- Lynch, M., and Conery, J.S.** (2000). The evolutionary fate and consequences of duplicate genes. *Science* **290**, 1151-1155.
- Madeira, F., Park, Y.M., Lee, J., Buso, N., Gur, T., Madhusoodanan, N., Basutkar, P., Tivey, A.R.N., Potter, S.C., Finn, R.D., and Lopez, R.** (2019). The EMBL-EBI search and sequence analysis tools APIs in 2019. *Nucleic Acids Res.* **47**, W636-W641.
- Muhlhausen, S., and Kollmar, M.** (2013). Whole genome duplication events in plant evolution reconstructed and predicted using myosin motor proteins. *BMC Evol. Biol.* **13**, 202.
- Nakai, M.** (2018). New Perspectives on Chloroplast Protein Import. *Plant Cell Physiol.* **59**, 1111-1119.
- Petsalaki, E.I., Bagos, P.G., Litou, Z.I., and Hamodrakas, S.J.** (2006). PredSL: a tool for the N-terminal sequence-based prediction of protein subcellular localization. *Genomics Proteomics Bioinformatics* **4**, 48-55.
- Porra, R.J., Thompson, W.A., and Kriedemann, P.E.** (1989). Determination of Accurate Extinction Coefficients and Simultaneous Equations for Assaying Chlorophyll a and b Extracted with Four Different Solvents: Verification of the Concentration of Chlorophyll Standards by Atomic Absorption Spectroscopy. *Biochimica et Biophysica Acta (BBA) - Bioenergetics* **975**, 384-394.
- Robson, F., Costa, M.M., Hepworth, S.R., Vizir, I., Pineiro, M., Reeves, P.H., Putterill, J., and Coupland, G.** (2001). Functional importance of conserved domains in the flowering-time gene *CONSTANS* demonstrated by analysis of mutant alleles and transgenic plants. *Plant J.* **28**, 619-631.
- Rotasperti, L., Sansoni, F., Mizzotti, C., Tadini, L., and Pesaresi, P.** (2020). Barley's Second Spring as A Model Organism for Chloroplast Research. *Plants (Basel)* **9**.
- Sperschneider, J., Catanzariti, A.M., DeBoer, K., Petre, B., Gardiner, D.M., Singh, K.B., Dodds, P.N., and Taylor, J.M.** (2017). LOCALIZER: subcellular localization prediction of both plant and effector proteins in the plant cell. *Sci. Rep.* **7**, 44598.
- Strayer, C., Oyama, T., Schultz, T.F., Raman, R., Somers, D.E., Mas, P., Panda, S., Kreps, J.A., and Kay, S.A.** (2000). Cloning of the Arabidopsis clock gene *TOC1*, an autoregulatory response regulator homolog. *Science* **289**, 768-771.
- Sugiura, M.** (1995). The chloroplast genome. *Essays Biochem.* **30**, 49-57.
- Sun, C.W., Huang, Y.C., and Chang, H.Y.** (2009a). CIA2 coordinately up-regulates protein import and synthesis in leaf chloroplasts. *Plant Physiol.* **150**, 879-888.
- Sun, C.W., Chen, L.J., Lin, L.C., and Li, H.M.** (2001). Leaf-specific upregulation of chloroplast translocon genes by a CCT motif-containing protein, CIA2. *Plant Cell* **13**, 2053-2061.
- Sun, Q., Zybailov, B., Majeran, W., Friso, G., Olinares, P.D., and van Wijk, K.J.** (2009b). PPDB, the Plant Proteomics Database at Cornell. *Nucleic Acids Res.* **37**, D969-974.
- Tschiersch, H., Junker, A., Meyer, R.C., and Altmann, T.** (2017). Establishment of integrated protocols for automated high throughput kinetic chlorophyll fluorescence analyses. *Plant Methods* **13**, 54.
- Wang, R., and Brattain, M.G.** (2007). The maximal size of protein to diffuse through the nuclear pore is larger than 60kDa. *FEBS Lett.* **581**, 3164-3170.

- Winter, D., Vinegar, B., Nahal, H., Ammar, R., Wilson, G.V., and Provart, N.J.** (2007). An "Electronic Fluorescent Pictograph" browser for exploring and analyzing large-scale biological data sets. *PLoS One* **2**, e718.
- Wu, G.-Z., and Bock, R.** (2021). GUN control in retrograde signaling: How GENOMES UNCOUPLED proteins adjust nuclear gene expression to plastid biogenesis. *The Plant Cell*.
- Yang, C.Y., and Sun, C.W.** (2020). Sequence analysis and protein interactions of Arabidopsis CIA2 and CIL proteins. *Bot Stud* **61**, 20.
- Yoo, S.D., Cho, Y.H., and Sheen, J.** (2007). Arabidopsis mesophyll protoplasts: a versatile cell system for transient gene expression analysis. *Nat. Protoc.* **2**, 1565-1572.
- Yu, F., Liu, X., Alsheikh, M., Park, S., and Rodermel, S.** (2008). Mutations in SUPPRESSOR OF VARIATION1, a factor required for normal chloroplast translation, suppress var2-mediated leaf variegation in Arabidopsis. *Plant Cell* **20**, 1786-1804.
- Zhang, Y.Y., Hao, Y.Y., Wang, Y.H., Wang, C.M., Wang, Y.L., Long, W.H., Wang, D., Liu, X., Jiang, L., and Wan, J.M.** (2017). Lethal albinic seedling, encoding a threonyl-tRNA synthetase, is involved in development of plastid protein synthesis system in rice. *Plant Cell Rep* **36**, 1053-1064.
- Zhao, X., Huang, J., and Chory, J.** (2020). Unraveling the Linkage between Retrograde Signaling and RNA Metabolism in Plants. *Trends Plant Sci* **25**, 141-147.

## FIGURE LEGENDS

### Figure 1. Alignment of protein sequences of HvCMF7, HvCMF3, CIA2 and CIL.

Green filled triangles show cleavage sites of cTP predicted by ChloroP (Emanuelsson et al., 1999) and arrows indicate NLS (cutoff score  $\geq 6.0$ ) predicted by cNLS Mapper (Kosugi et al., 2009). Numbers in parentheses indicate amino acid positions in the respective proteins. The CCT domain is underlined in green.

### Figure 2. Site-directed mutagenesis of the *cil* gene by CRISPR.

(A) Structure of the *cil* gene and guide RNA selection. The protospacer sequences are indicated by gray background and the protospacer adjacent motifs are highlighted by blue color.

(B) Mutation detection in T<sub>1</sub> plants. Two chimeric plants, AtCIL\_P4\_2 and AtCIL\_P9\_4, carrying mutations at either or both PS2 and PS3 target loci. Large deletions/insertions are represented by red dashes and small insertions by red letters. Coordinates in parentheses indicate the region of deletion. The adenine in the start codon of the *cil* sequence is counted as +1.

(C) Inheritance of mutations in the T<sub>2</sub> generation. The heterozygous plant AtCIL\_P4\_2\_2 and the homozygous plant AtCIL\_P4\_2\_18 carry a one-nucleotide insertion 3 bp upstream of the protospacer adjacent motif of the PS2 locus.

(D) Inheritance of mutations in the T<sub>3</sub> generation. One biallelic mutant, AtCIL\_P4\_2\_2\_5, was identified. It carries a one-nucleotide insertion and a two bp deletion. The mutation of the T<sub>2</sub> plant AtCIL\_P4\_2\_18 is stably transmitted from the T<sub>2</sub> to the T<sub>3</sub> generation.

(E) Alignment of the deduced N-terminal protein sequences of wild type and *cil*. The altered amino acid of the mutant is underlined; an asterisk indicates the position of the immature stop codon.

### Figure 3. Subcellular localization of CIL:GFP fusion protein.

(A) Schematic drawing of the construct used for protoplast transformation. *pUbiAT*, Arabidopsis *Ubiquitin* 10 promoter; CIL\_CDS, coding sequence of the *CIL* gene; GFP, green fluorescent protein; tNOS, *Agrobacterium tumefaciens* *NOPALINE SYNTHASE* terminator. The drawing is not in proportion with gene length.

(B) Subcellular localization of the CIL:GFP fusion protein in Arabidopsis protoplasts. Green and red colors are assigned to GFP and chlorophyll fluorescence, respectively. The yellow arrow in the merged panel indicates the nucleus. Scale bar. 10  $\mu$ m.

### Figure 4. Measurement of chlorophyll content and photosynthetic performance of wild type Col-0 and *cil*, *cia2* and *cia2cil* mutants.

(A) Phenotype of Col-0, *cil*, *cia2* and *cia2cil* plants. Scale bar, 2 cm.

(B) False-color images of the operating light use efficiency of PSII ( $\Phi$ PSII).

(C) False-color images of NDVI imaging of actinic light absorbance.

(D-F) Quantification of chlorophyll *a* (D), chlorophyll *b* (E) and ratios of chlorophyll *a* to *b* (F).

(G-K) Measurement of photosynthetic parameters. Results are presented as mean  $\pm$  SEM. Number of plants used for chlorophyll content measurement N = 10; number of plants used for photosynthetic measurement N = 15. *Student's t-test* (Tails = 2; Type = 2) significant levels, n.s, not significant, \*  $p < 0.05$ , \*\*  $p < 0.01$ , \*\*\*  $p < 0.001$ .  $\Phi$ PSII, photosystem II operating efficiency; Absorbance, absorbance of actinic light; ETR, electron transport rate;  $F_v/F_m$ , maximum quantum yield of PSII photochemistry measured in the dark-adapted state; NPQ, non-photochemical quenching. DAS, days after sowing. Plants and images shown in panels A-C were at developmental stages 20 DAS. All photosynthetic measurements were performed at 120  $\mu$ E actinic light.

### Figure 5. Ultrastructural analysis of chloroplasts of the wild type Col-0, and *cia2*, *cil*, and *cia2cil* mutants.

(A-H) Comparison of the chloroplast ultrastructure in wild type and mutants. Panels E to H represent larger magnification of marked areas of the corresponding plastid in the top panels A to D, respectively. ST, stroma thylakoid; G, granum.

(I-P) Quantification of chloroplast architecture and components of photosynthetic apparatus. The granum number (L) and thylakoid per granum (M) were counted within an area of 1  $\mu$ m<sup>2</sup>. Max. granum height (O) represents the granum with maximum number of thylakoid membranes within each chloroplast. Thylakoid per max. granum (P) represents the number of thylakoid membranes within the highest granum. Results are presented as mean  $\pm$  SEM (N  $\geq$  40). *Student's t-test* (Tails = 2; Type = 3) significant levels, n.s, not significant, \*  $p < 0.05$ , \*\*  $p < 0.01$ , \*\*\*  $p < 0.001$ .

### Figure 6. Analysis of chloroplast rRNA processing in Col-0, *cil*, *cia2* and *cia2cil* mutant plants.

(A) Structure and transcript pattern of the chloroplast *rrn* operon. Black boxes indicate exons and white boxes indicate introns. Vertical arrows indicate processing sites in the primary transcripts of the *rrn* operon. Positions of internal cleavage sites (hidden breaks) in the 23S rRNA are shown as black triangles. Positions of the hybridization probes for 16S and 23S are indicated below the operon structure. The 7.4-kb primary transcript and various processing precursors are shown with grey lines; the mature forms of 16S and 23S rRNAs are shown with black lines. The Arabidopsis chloroplast genome (GenBank accession number: NC000932.1) was used as reference.

(B) Separation of cytosolic and chloroplastic rRNAs on agarose gel. The 23Sa, 23Sb and 23Sc bands represent 1.3 kb, 1.1 kb and 0.5 kb mature forms of 23S rRNA, respectively. Each sample with 3 biological replicates. Arrows indicate intermediates of inefficient processing of the 23S rRNA.

(C) Analysis of 23S rRNA processing by RNA gel-blot hybridization. Arrows indicate pre-mature 23S rRNA species shown in panel B.

(D) Analysis of 16S rRNA processing by RNA gel-blot hybridization. The original gel images are provided as Supplemental Figure 4.

**Figure 7. Genetic complementation of the *cia2* mutant with *HvCMF3*, *HvCMF7* and  $\Delta cTP\_CIA2$ .**

(A) Phenotype of *cia2* mutant, complementation lines and wild type.

(B) Enlargement of the central region of the respective plants in panel A showing phenotype of the young vegetative rosette leaves.

(C) False-color images of the operating light use efficiency of PSII ( $\Phi_{PSII}$ ).

(D) Quantification of chlorophyll contents.

(E) Quantification of photosynthesis operating efficiency. Results are presented as mean  $\pm$  SEM (N  $\geq$  15 in panel D; N  $\geq$  9 in panel E). *Student's t-test* (Tails = 2; Type = 3) significant levels, n.s, not significant, \*  $p < 0.05$ , \*\*  $p < 0.01$ , \*\*\*  $p < 0.001$ . DAT, days after transfer to soil. Scale bar in panel A, 2 cm. Scale bar in panel B, 0.5 cm.



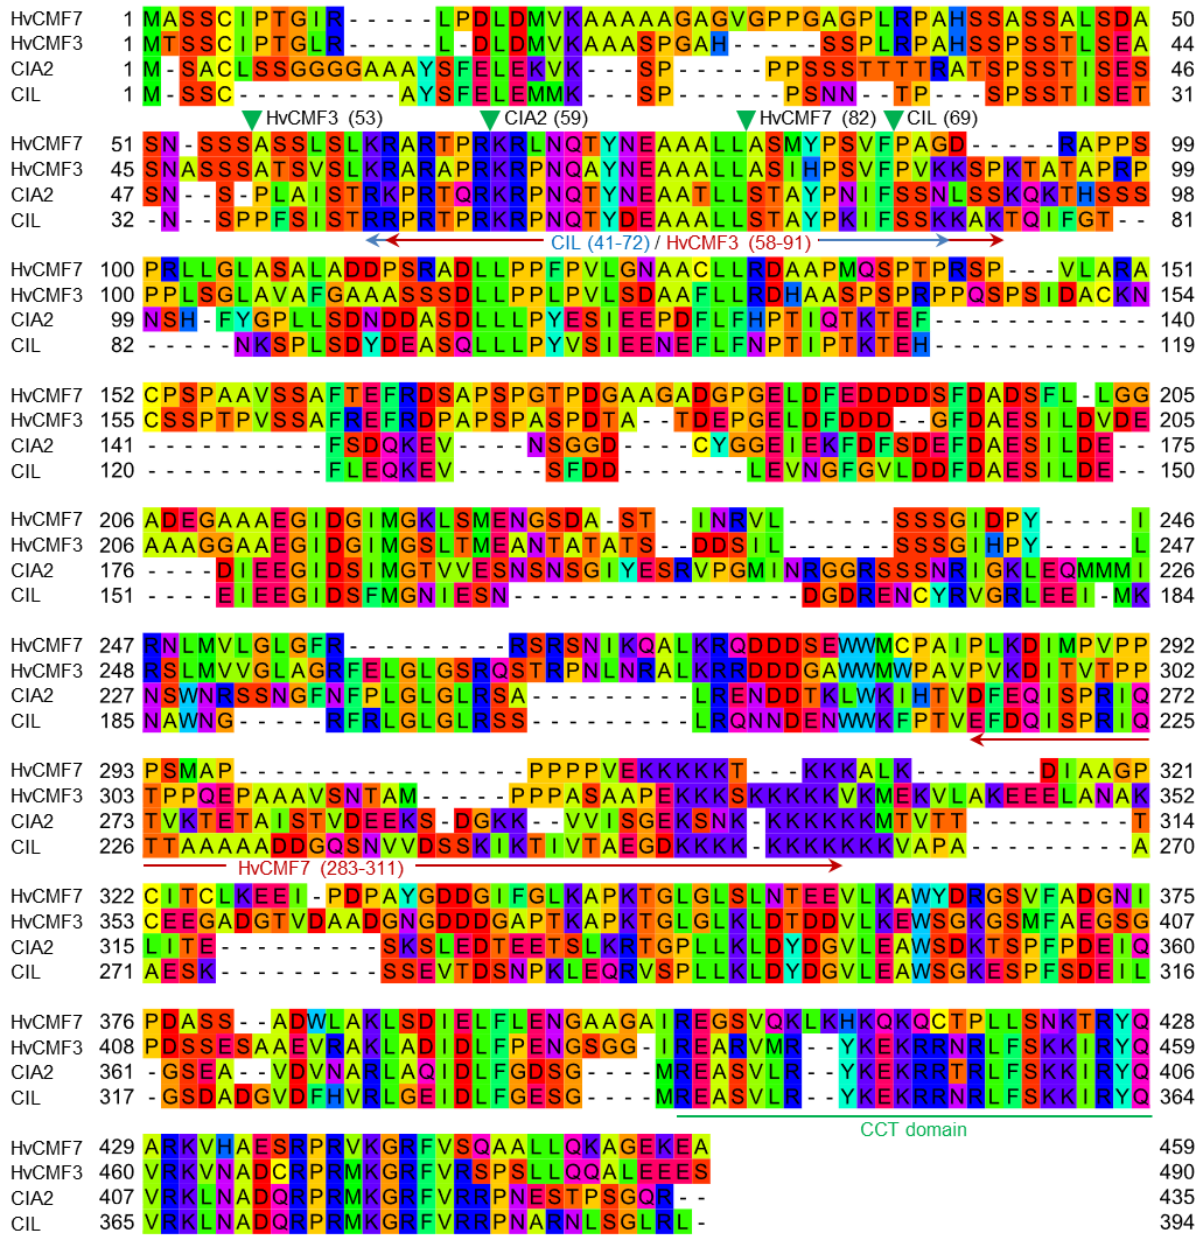

**Figure 1. Alignment of protein sequences of HvCMF7, HvCMF3, CIA2 and CIL.** Green filled triangles show cleavage sites of cTP predicted by ChlorP (Emanuelsson et al., 1999) and arrows indicate nuclear localization signals (cutoff score  $\geq 6.0$ ) predicted by cNLS Mapper (Kosugi et al., 2009). Numbers in parentheses indicate amino acid positions in the respective proteins. The CCT domain is highlighted with green underline.

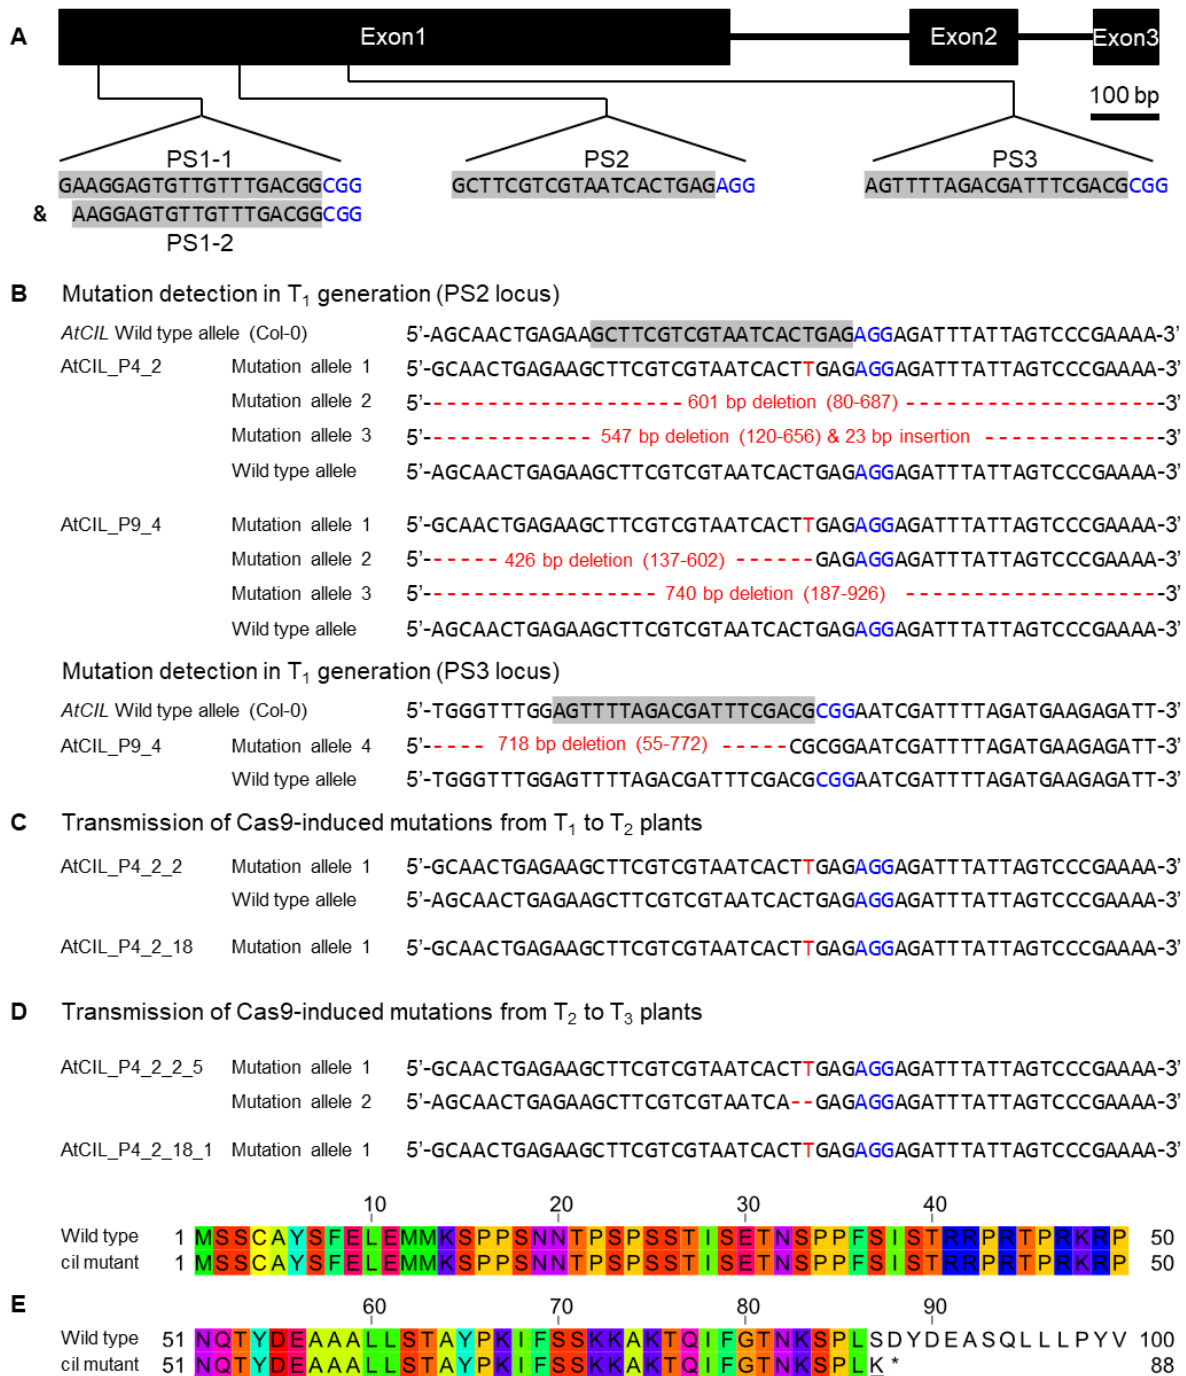

**Figure 2. Site-directed mutagenesis of the *cil* gene by CRISPR.**

(A) Gene structure of the *cil* gene and guide RNA selection. The protospacer sequences are indicated by gray background and the protospacer adjacent motifs are highlighted with blue color.

(B) Mutation detection in T<sub>1</sub> plants. Two chimeric plants, *AtCIL\_P4\_2* and *AtCIL\_P9\_4*, carrying mutations at either or both PS2 and PS3 target loci. Large deletions/insertions are represented by red dashes and small insertions by red letters. Coordinates in the parentheses indicate the region of deletion. The adenine of start codon of the *cil* genomic sequence is counted as +1.

(C) Inheritance of mutations in T<sub>2</sub> generation. Heterozygous plant *AtCIL\_P4\_2\_2* and homozygous plant *AtCIL\_P4\_2\_18* carry a one-nucleotide insertion at 3 bp upstream of the protospacer adjacent motif of the PS2 locus.

(D) Inheritance of mutations in the T<sub>3</sub> generation. One biallelic mutant *AtCIL\_P4\_2\_2\_5*, was identified. It carries a one-nucleotide insertion and 2 bp deletion. The mutation of T<sub>2</sub> plant *AtCIL\_P4\_2\_18* is stably transmitted from T<sub>2</sub> to T<sub>3</sub> generation.

(E) Alignment of deduced N-terminal protein sequences of wild type and *cil* mutant. Altered amino acid of the mutant is highlighted by underline; asterisk indicates position of the immature stop codon.

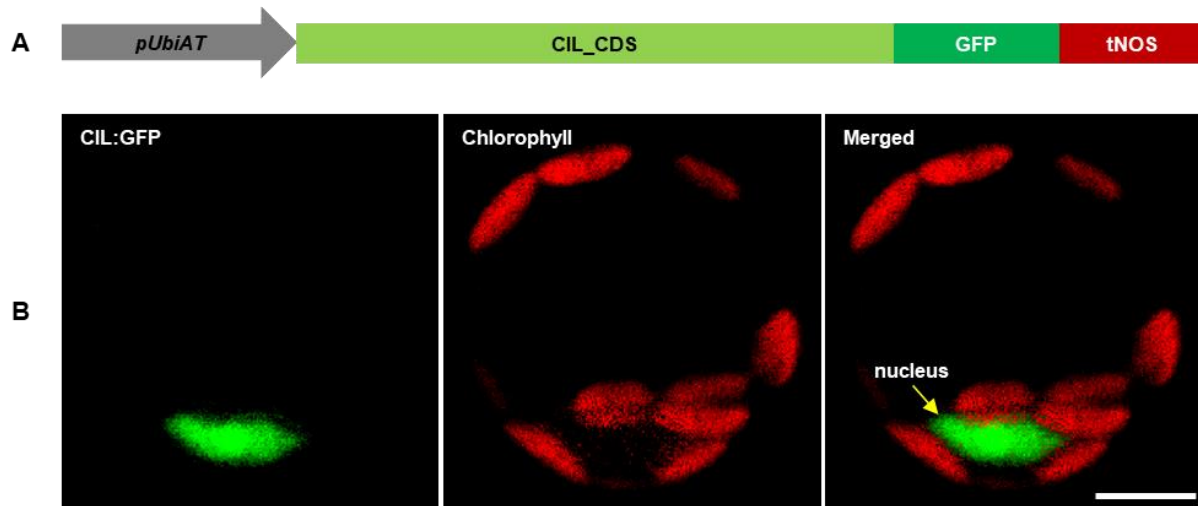

**Figure 3. Subcellular localization of CIL:GFP fusion protein.**

(A) Schematic drawing of the construct used for protoplast transformation. *pUbiAT*, Arabidopsis *Ubiquitin 10* promoter; *CIL\_CDS*, coding sequence of the *CIL* gene; GFP, green fluorescent protein; *tNOS*, *Agrobacterium tumefaciens NOPALINE SYNTHASE* terminator. The schematic drawing is not in proportion with gene length.

(B) Subcellular localization of CIL:GFP fusion protein in Arabidopsis protoplasts. Green and red colors are assigned to GFP and chlorophyll fluorescence, respectively. Yellow arrow in the merged panel indicates the nucleus. Scale bar. 10  $\mu$ m.

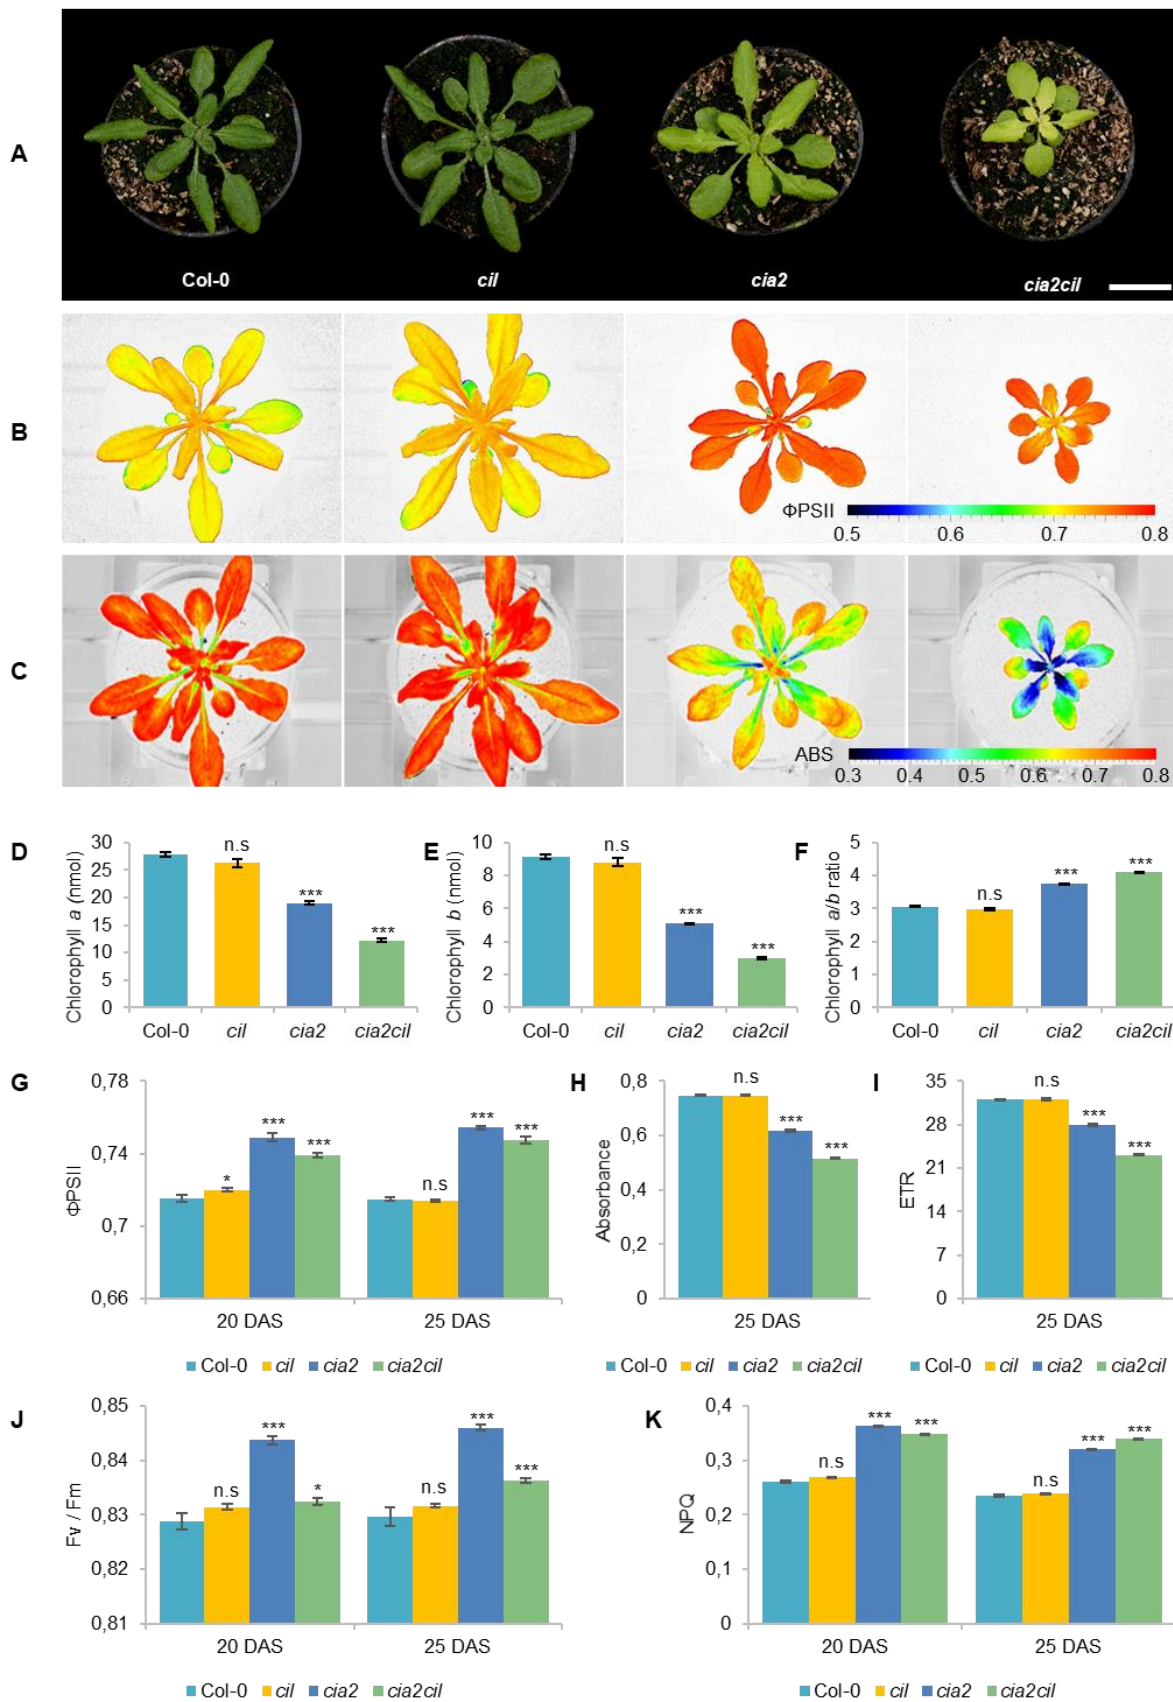

**Figure 4. Measurement of chlorophyll content and photosynthetic performance of wild type Col-0 and *cil*, *cia2* and *cia2cil* mutants.**

(A) Phenotype of Col-0, *cil*, *cia2* and *cia2cil* plants. Scale bar, 2 cm.

(B) False-color images of the operating light use efficiency of PSII ( $\Phi$ PSII).

(C) False-color images of NDVI imaging of actinic light absorbance.



(D-F) Quantification of chlorophyll *a* (D), chlorophyll *b* (E) and ratios of chlorophyll *a* to *b* (F).

(G-K) Measurement of photosynthetic parameters. Results are presented as mean  $\pm$  SEM. Number of plants used for chlorophyll content measurement  $N = 10$ ; Number of plants used for photosynthetic measurement  $N = 15$ . *Student's t-test* (Tails = 2; Type = 2) significant levels, n.s, not significant, \*  $p < 0.05$ , \*\*  $p < 0.01$ , \*\*\*  $p < 0.001$ .  $\Phi$ PSII, Photosystem II operating efficiency; Absorbance, absorbance of actinic light; ETR, electron transport rate;  $F_v/F_m$ , maximum quantum yield of PSII photochemistry measured in the dark-adapted state; NPQ, non-photochemical quenching. DAS, days after sowing. Plants and images shown in panels A-C were at developmental stages 20 DAS. All photosynthetic measurements were performed at 120  $\mu$ E actinic light.

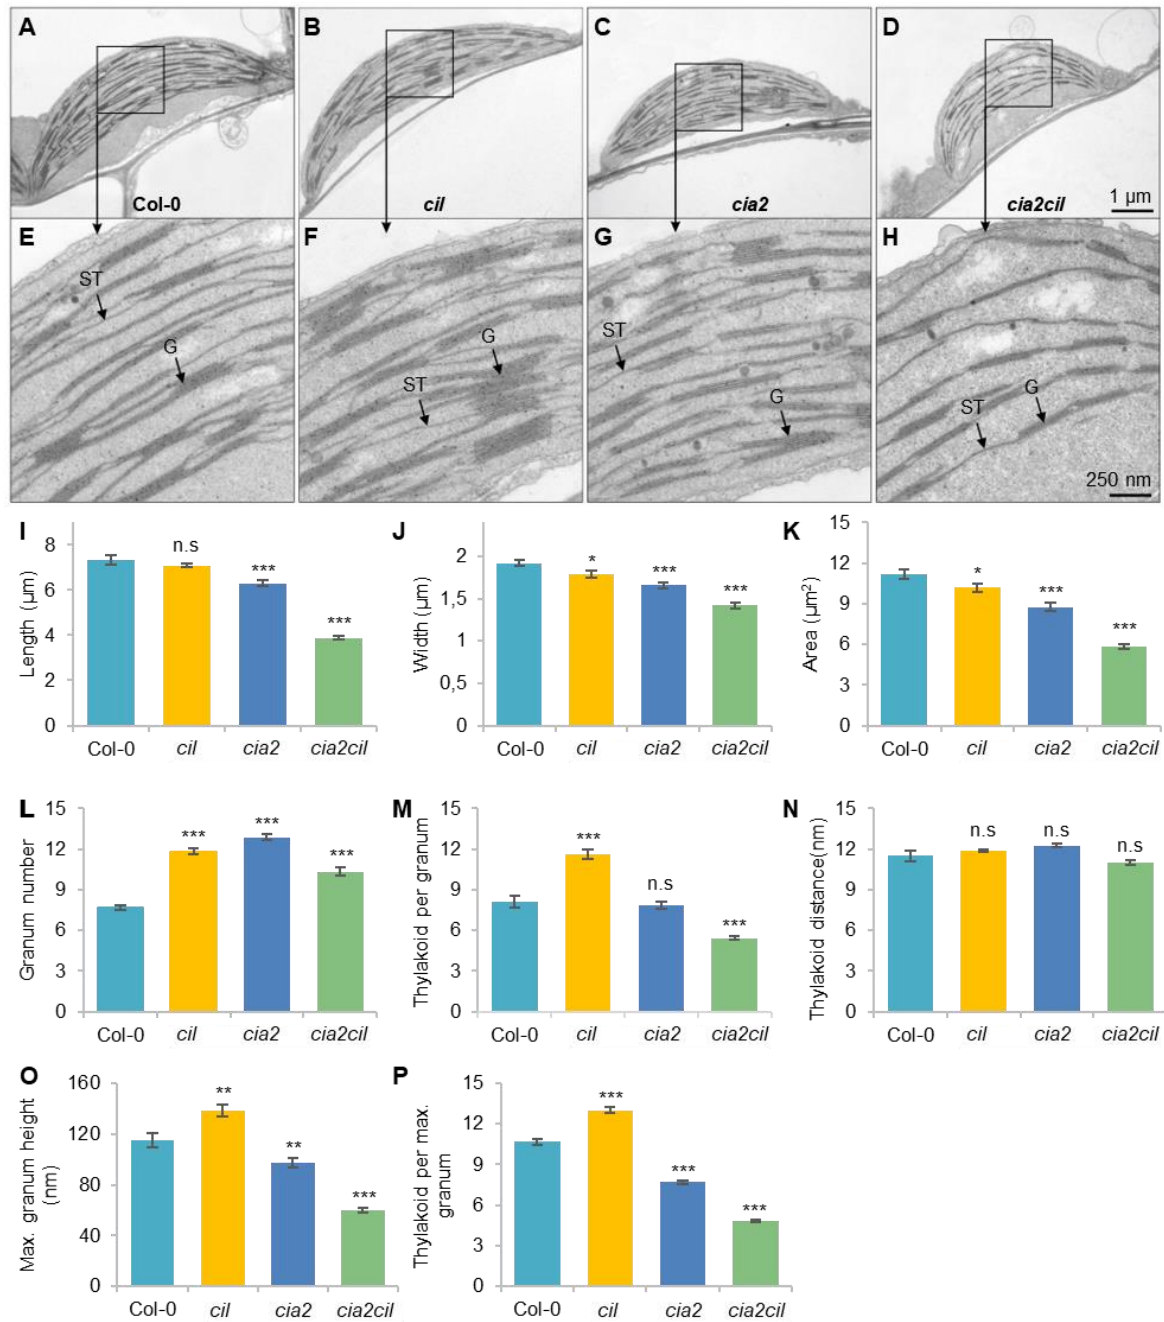

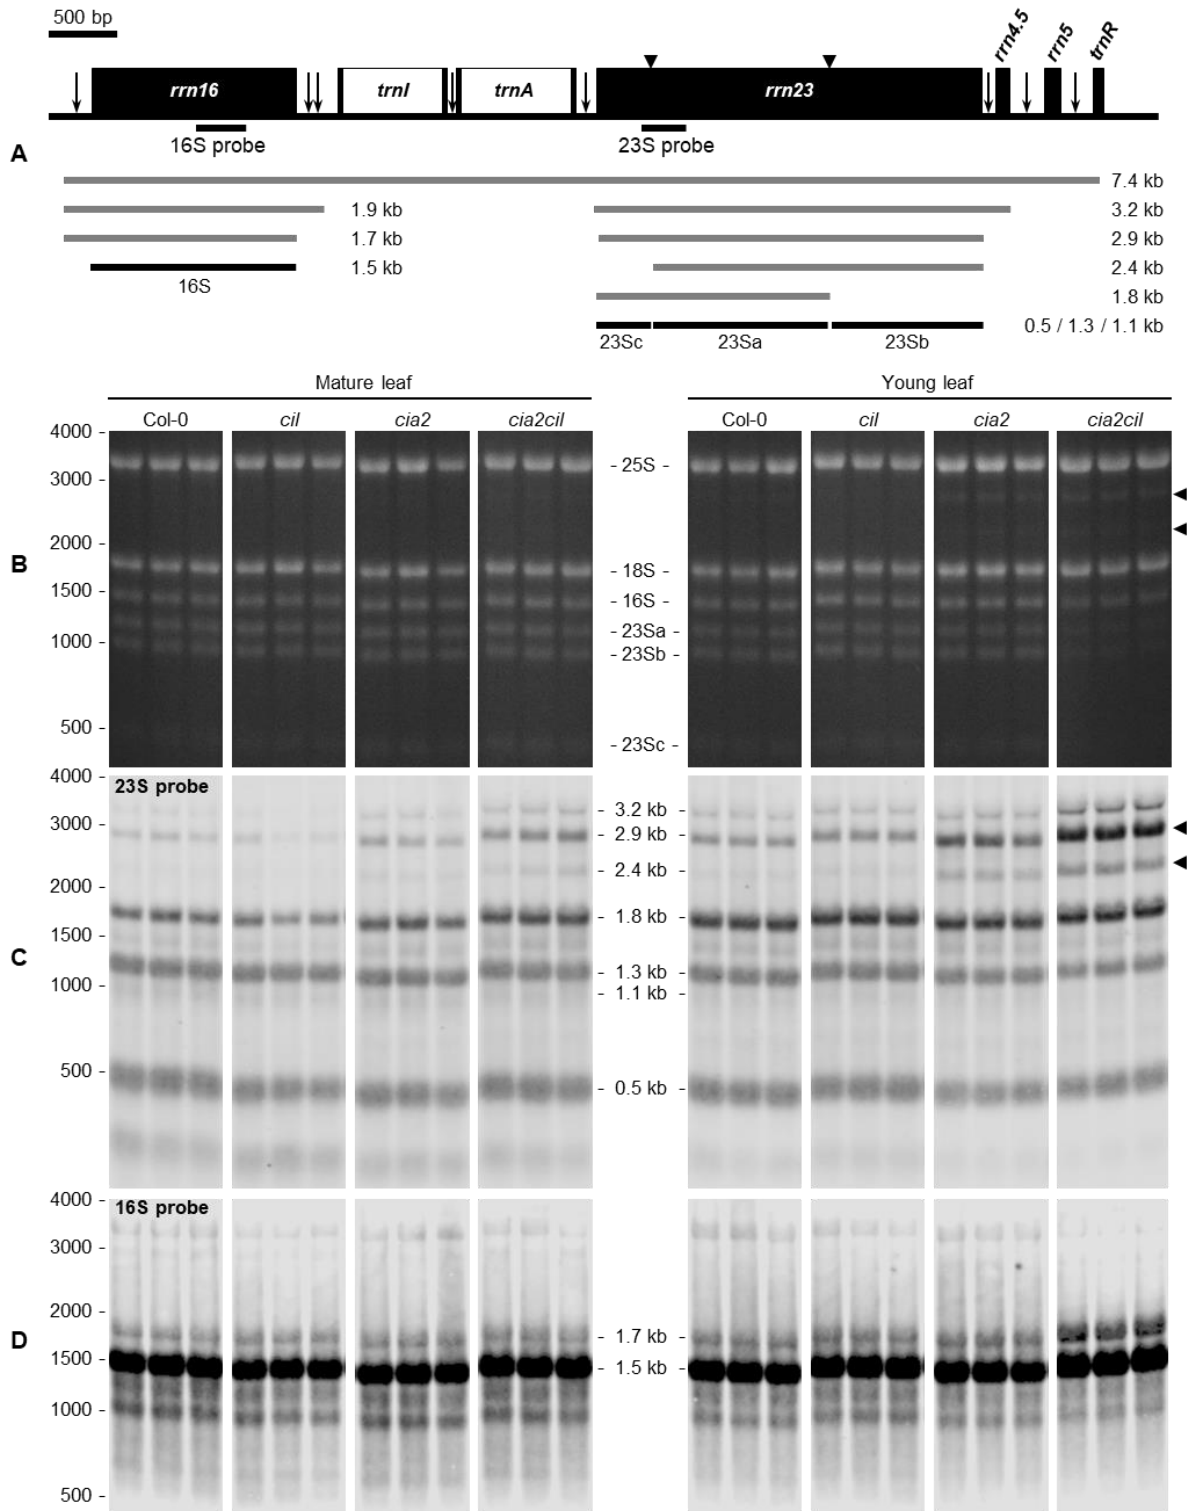

**Figure 6. Analysis of chloroplast rRNA processing in Col-0, *cil*, *cia2* and *cia2cil* mutant plants.** (A) Structure and transcript pattern of the chloroplast *rrn* operon. Black boxes indicate exons and white boxes indicate introns. Vertical arrows indicate processing sites in the primary transcripts of the *rrn* operon. Positions of internal cleavage sites (hidden breaks) in the 23S rRNA are shown as black triangles. Positions of the hybridization probes for 16S and 23S are indicated below the operon structure. The 7.4-kb primary transcript and various processing precursors are shown with grey lines; the mature forms of 16S and 23S rRNAs are shown with black lines. The Arabidopsis chloroplast genome (GenBank accession number: NC000932.1) was used as reference.

(B) Separation of cytosolic and chloroplastic rRNAs on agarose gel. The 23Sa, 23Sb and 23Sc bands represent 1.3 kb, 1.1 kb and 0.5 kb mature forms of 23S rRNA, respectively. Each sample with 3 biological replicates. Arrows indicate intermediates of inefficient processing of the 23S rRNA.

(C) Analysis of 23S rRNA processing by RNA gel-blot hybridization. Arrows indicate pre-mature 23S rRNA species shown in panel B.

(D) Analysis of 16S rRNA processing by RNA gel-blot hybridization. The original gel images are provided as Supplemental Figure 4.



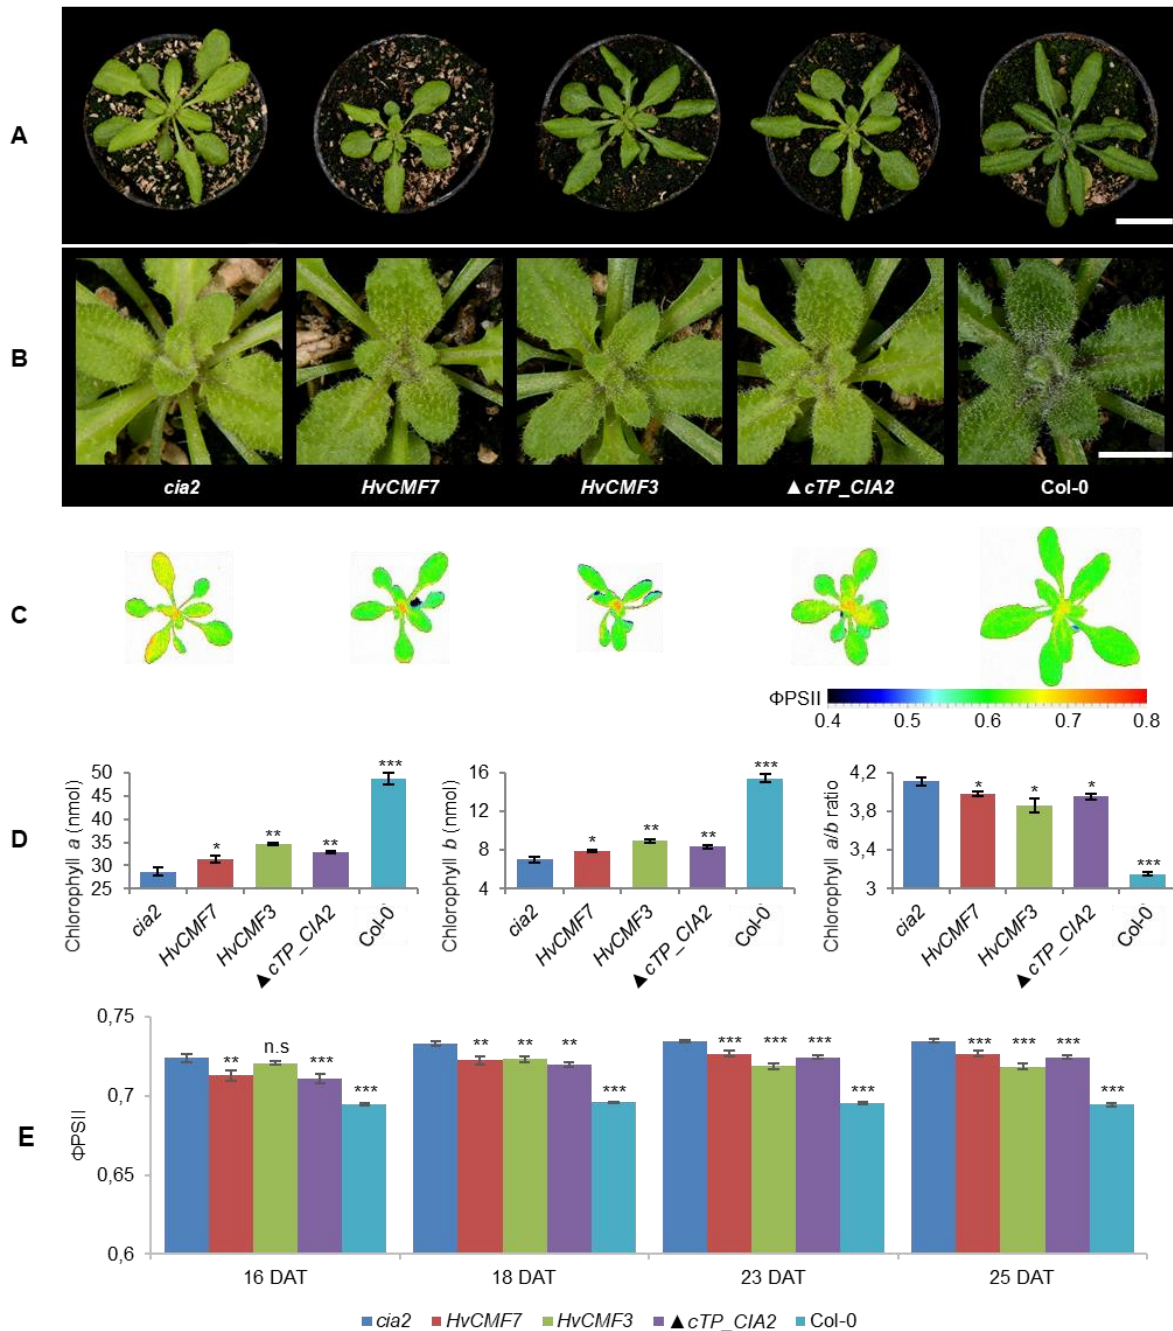

**Figure 7. Genetic complementation of the *cia2* mutant with *HvCMF3*, *HvCMF7* and  $\Delta cTP\_CIA2$ .** (A) Phenotype of *cia2* mutant, complementation lines and wild type. (B) Enlargement of the central region of the respective plants in panel A showing phenotype of the young vegetative rosette leaves. (C) False-color images of the operating light use efficiency of PSII ( $\Phi_{PSII}$ ). (D) Quantification of chlorophyll contents. (E) Quantification of photosynthesis operating efficiency. Results are presented as mean  $\pm$  SEM (N  $\geq$  15 in panel D; N  $\geq$  9 in panel E). *Student's t-test* (Tails = 2; Type = 3) significant levels, n.s., not significant, \*  $p < 0.05$ , \*\*  $p < 0.01$ , \*\*\*  $p < 0.001$ . DAT, days after transfer to soil. Scale bar in panel A, 2 cm. Scale bar in panel B, 0.5 cm.
